# Supplementary material for: Reinvigorating aza-Michael reactions under ionic liquid catalysis: a greener approach
Source: Royal Society of Chemistry journal article supplement (doi:10.1039/d3ob02006a), 2024-01-01

## SUPPORTING INFORMATION

### Reinvigorating Aza-Michael Reactions under Ionic Liquid Catalysis: A Greener Approach

Silvia Izquierdo,<sup>\*[a]</sup> Pedro Cintas,<sup>[b]</sup> Carlos J. Durán-Valle,<sup>[b]</sup> Juan García de la Concepción,<sup>[b]</sup> Ignacio M. López-Coca <sup>\*[a]</sup>

<sup>[a]</sup> Department of Organic and Inorganic Chemistry, School of Technology, INTERRA, Universidad de Extremadura, Cáceres - 10003, Spain

<sup>[b]</sup> Department of Organic and Inorganic Chemistry, Faculty of Sciences and IACYS-Green Chemistry and Sustainable Development Unit, Universidad de Extremadura, 06006-Badajoz, Spain

E-mail: [sizquierdo@unex.es](mailto:sizquierdo@unex.es), [iglomar@unex.es](mailto:iglomar@unex.es)

# Product characterization

[Choline][Proline]

LI Pro Cho 500.1.fid —

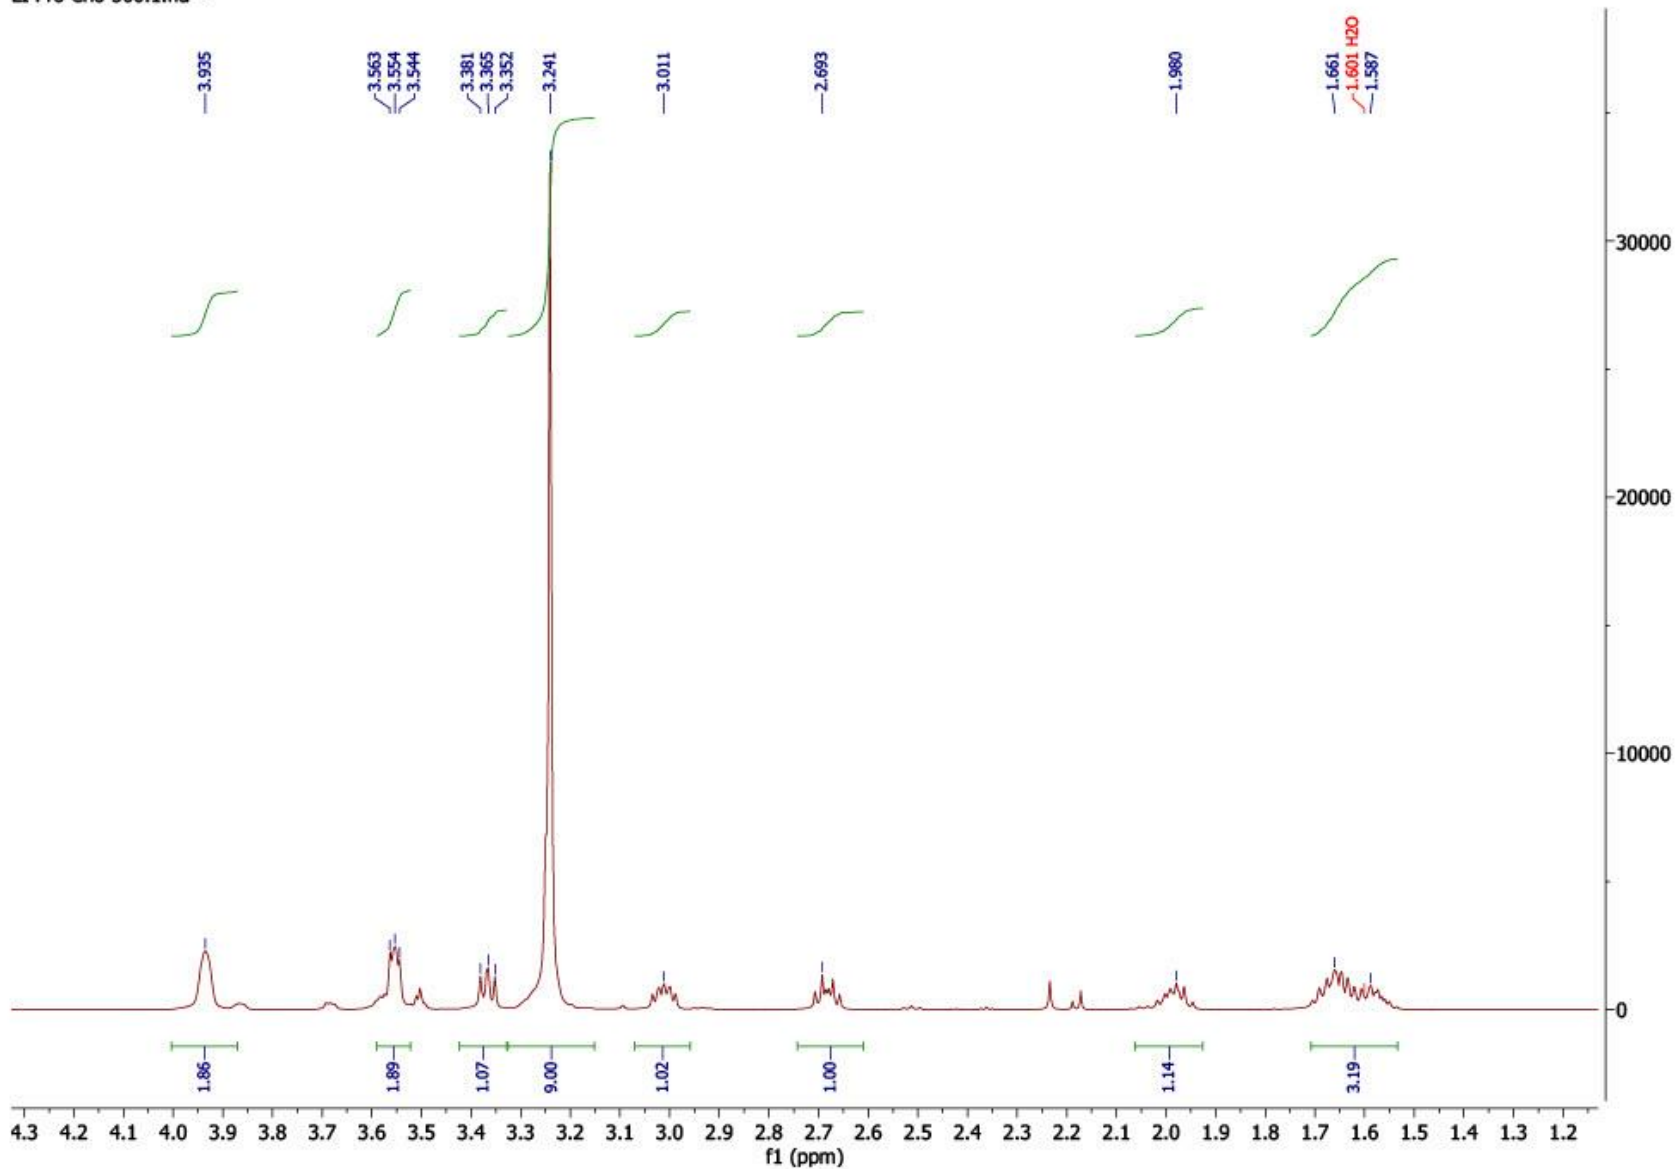

[Choline][Arginine]

ARG-CH-3 500.1.fid —

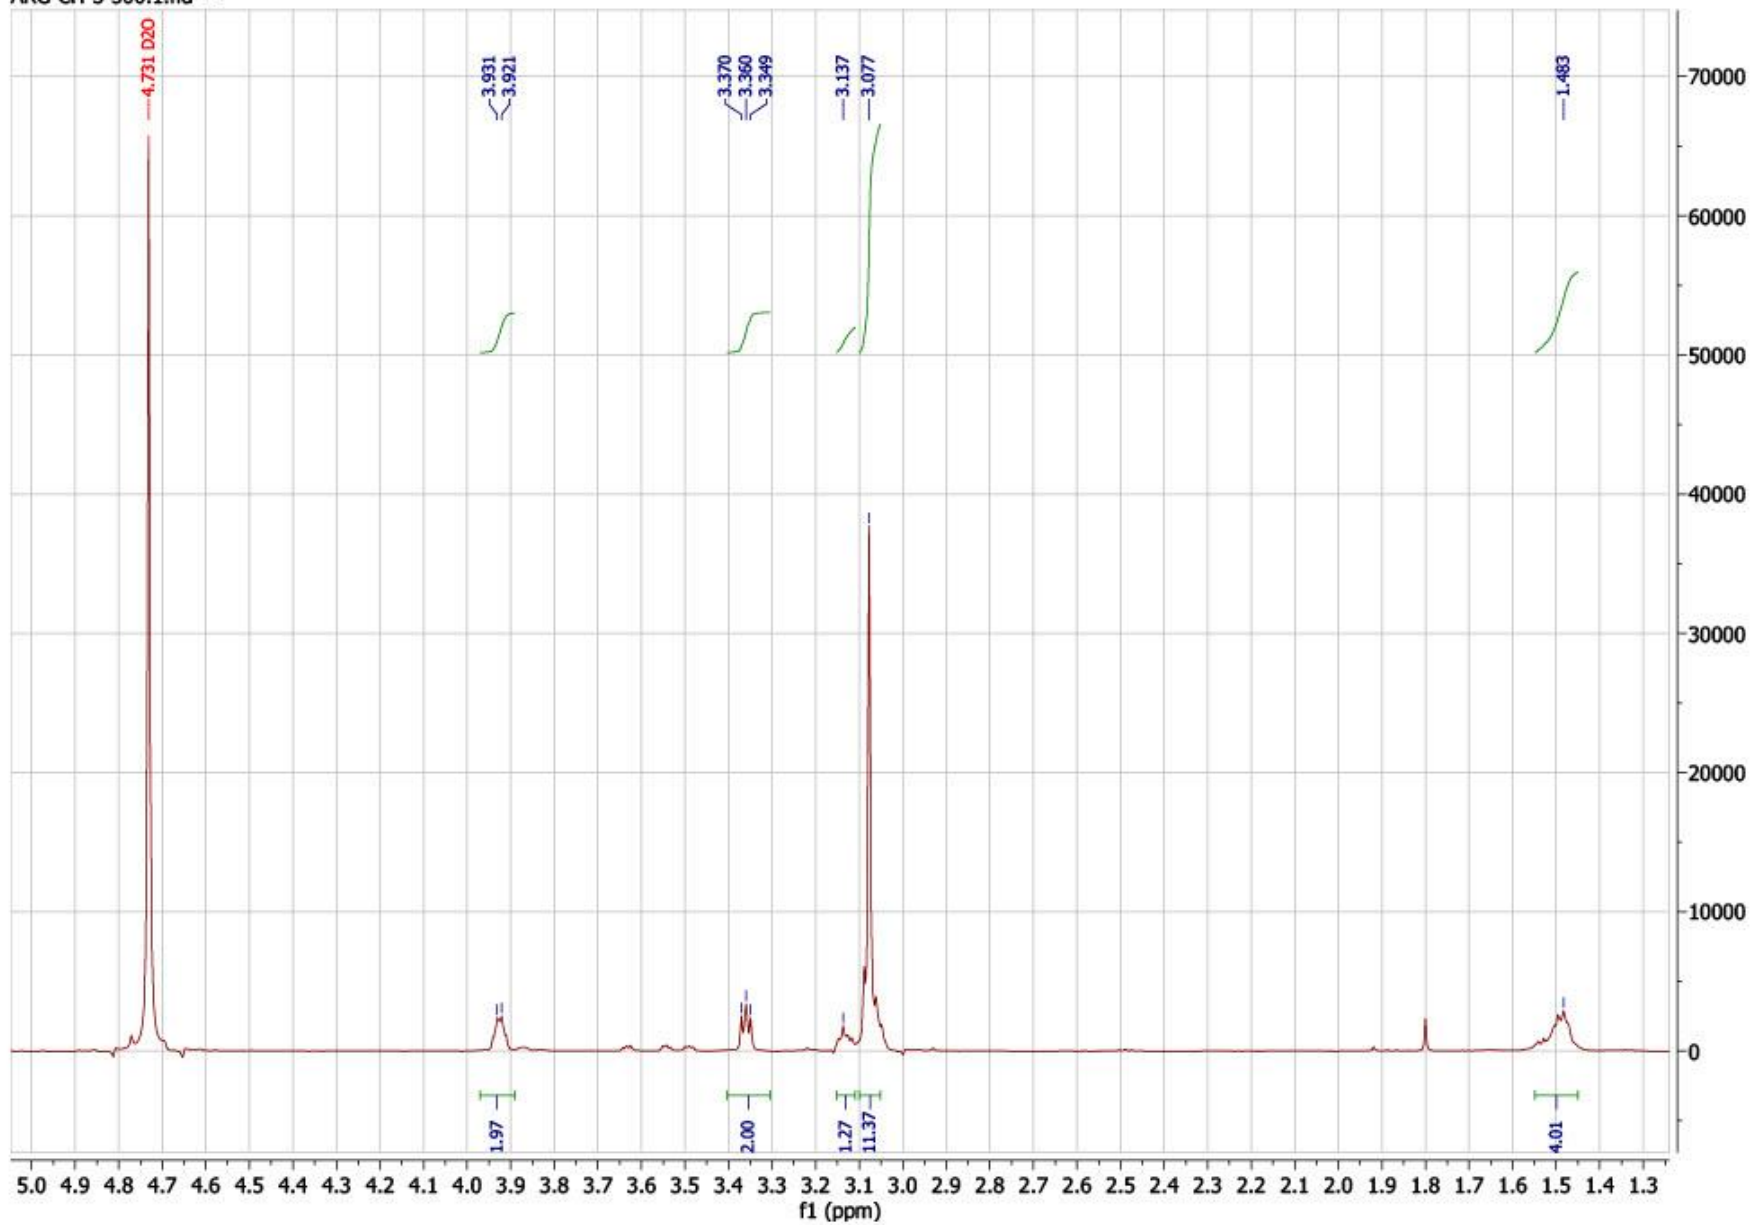

[Choline][Histidine]

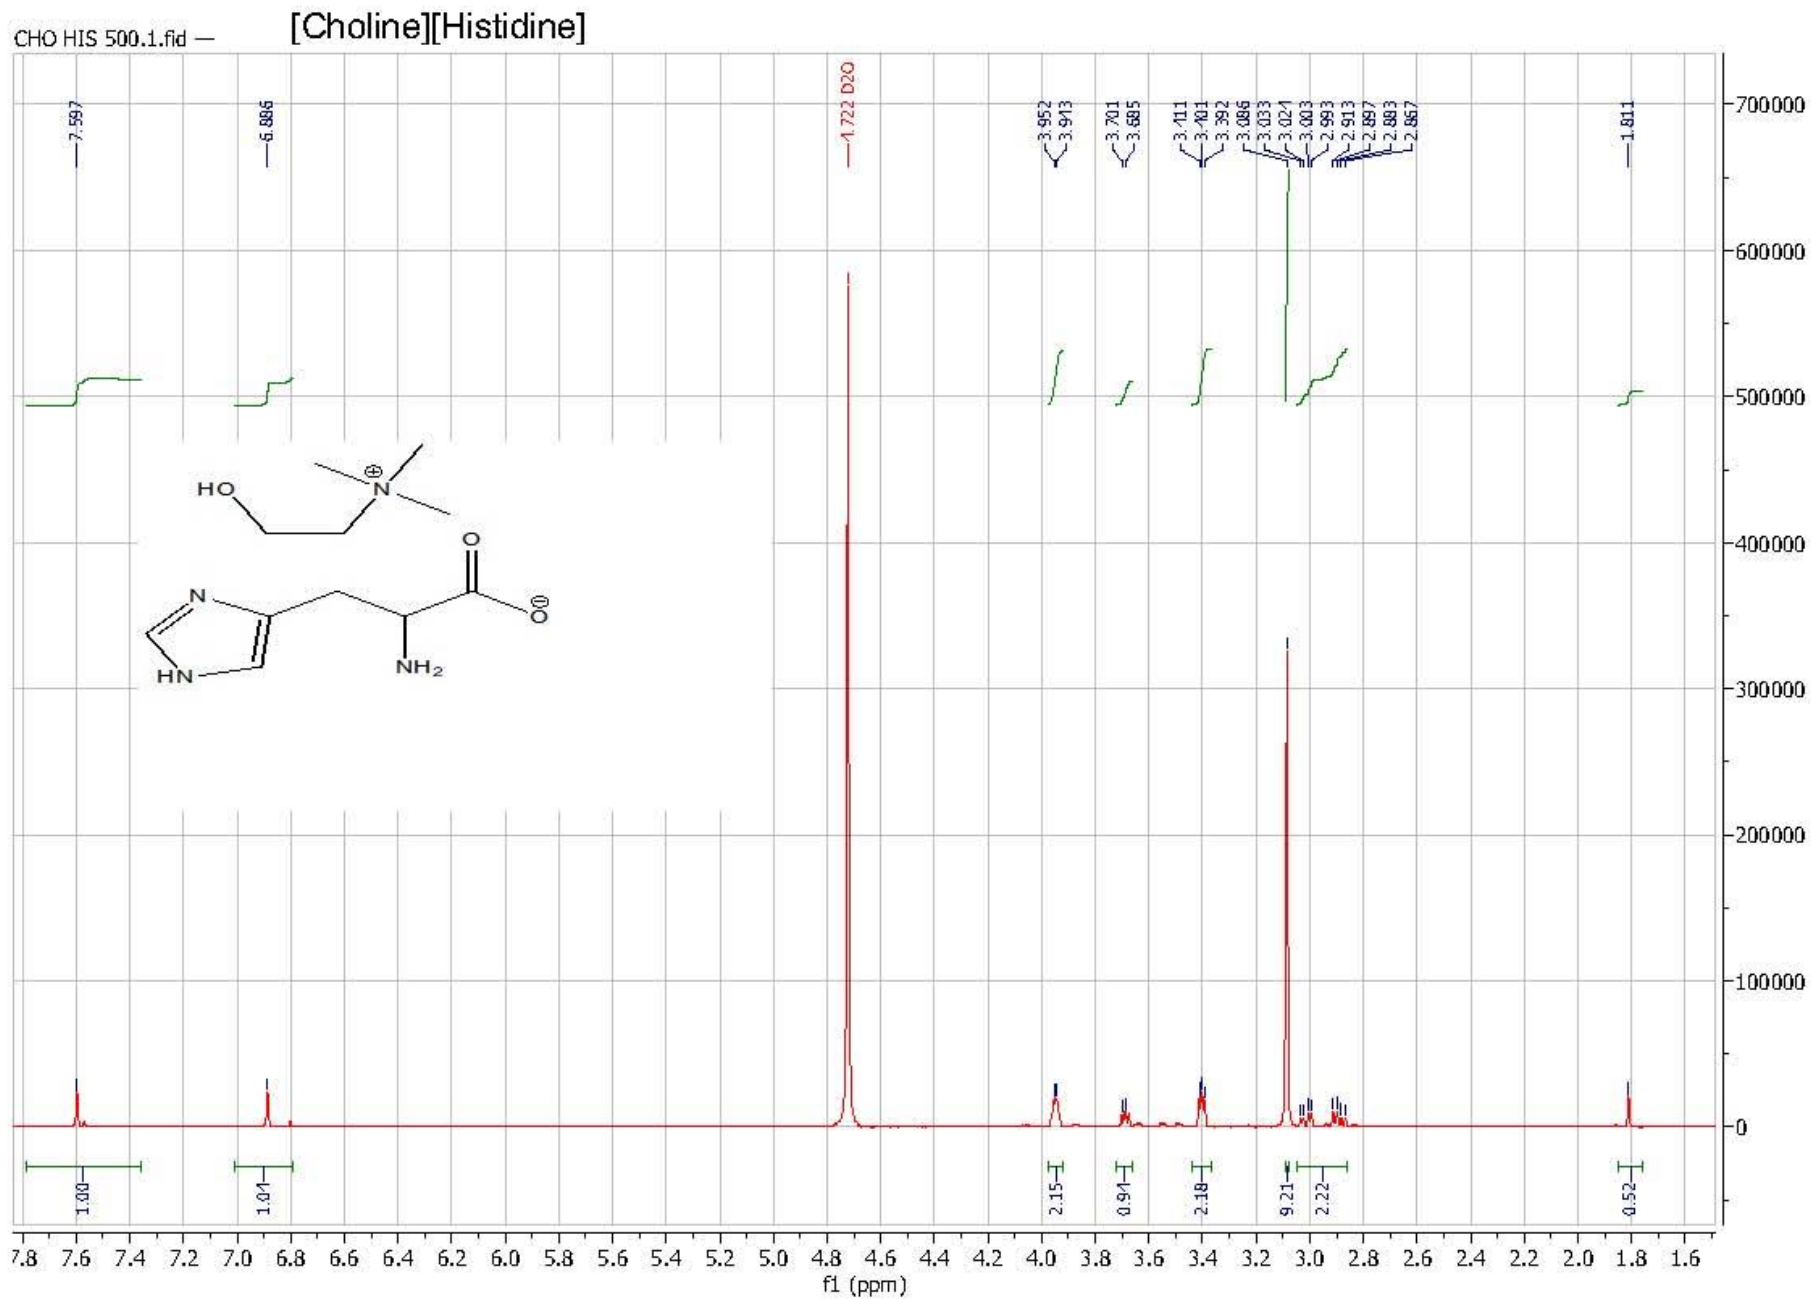

[Choline][Lysine]

LYS-CH-3 500.1.fid —

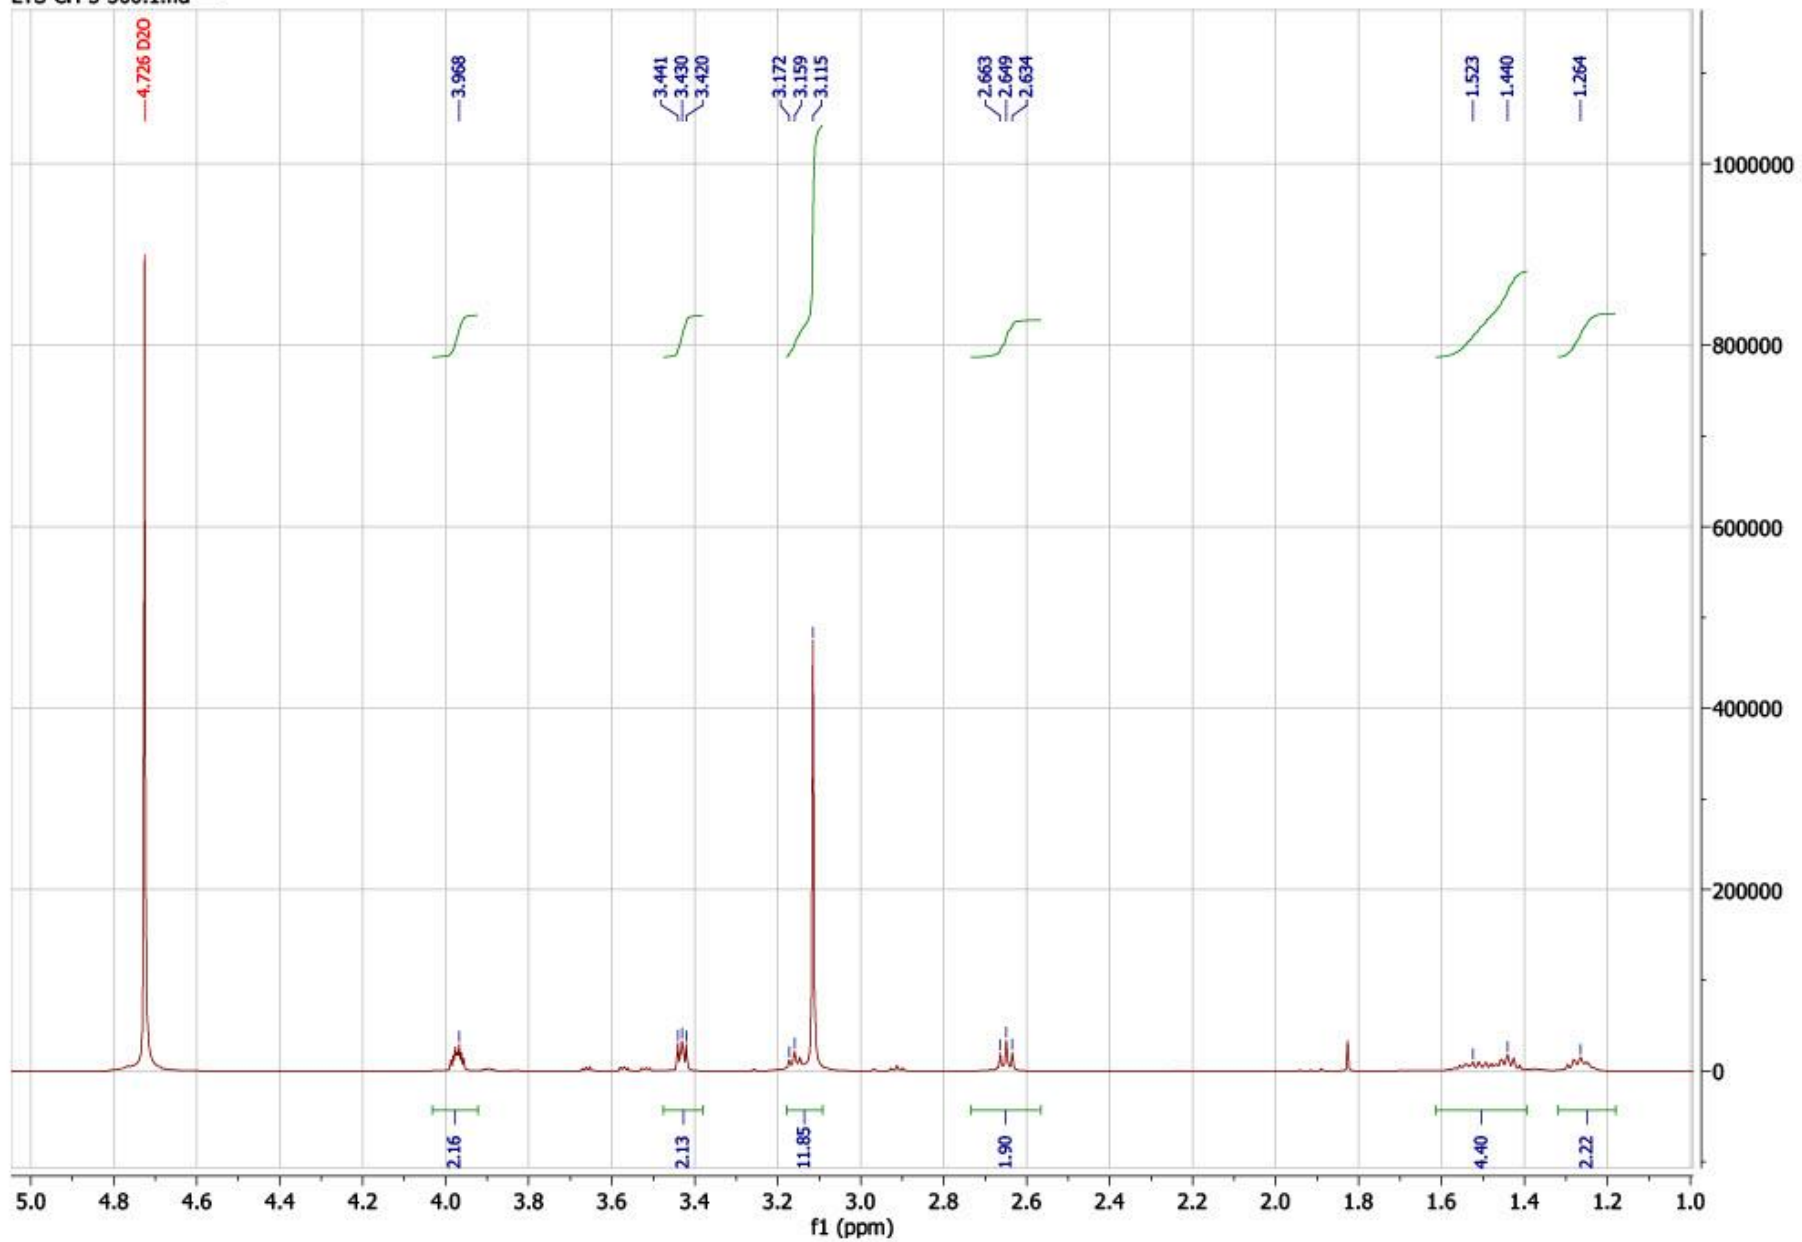

[Choline][Glutamate]

LI-GLUT-CHO 500.1.fid —

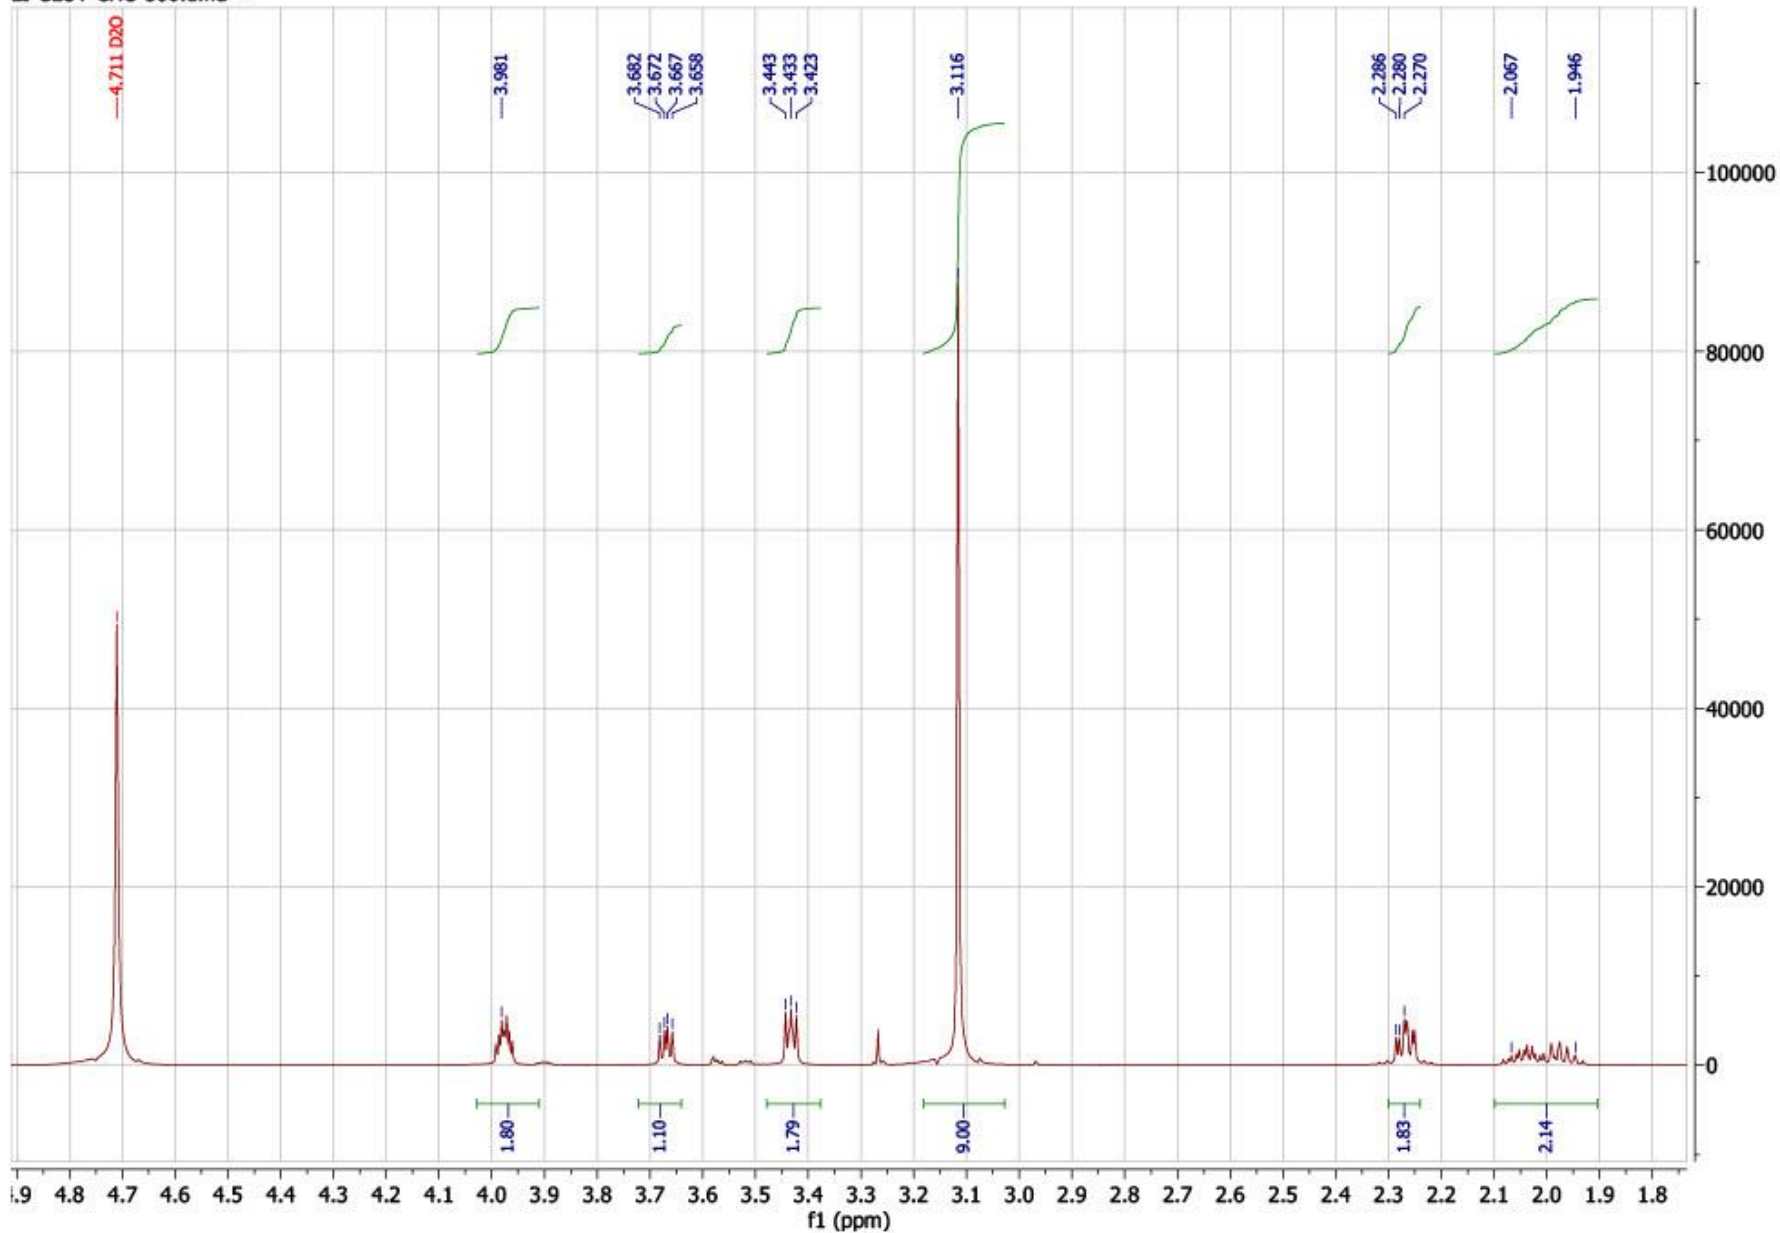

3-(benzylamino)propanenitrile

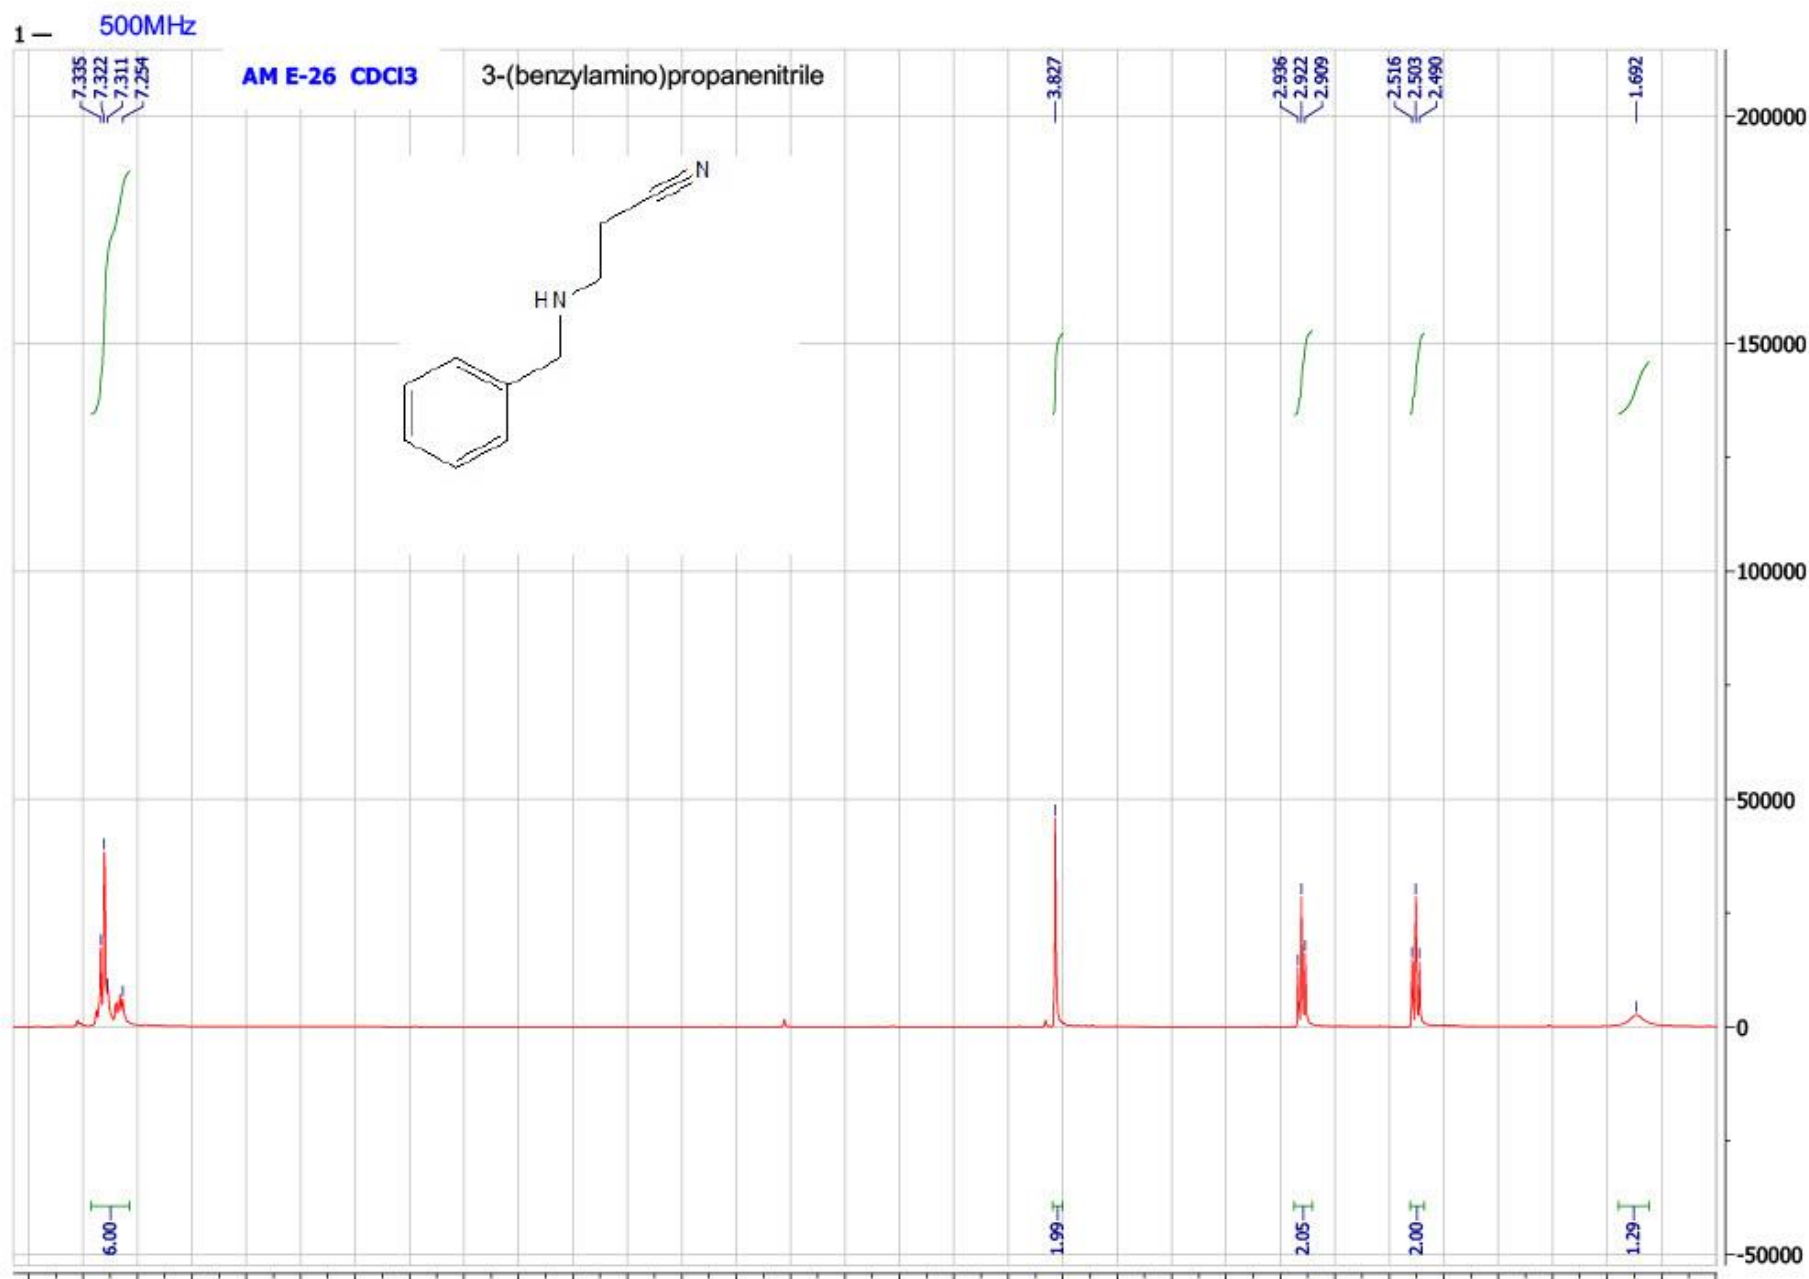

methyl 3-(benzylamino)propanoate

AME116 F1 500.1.fid — methyl 3-(benzylamino)propanoate

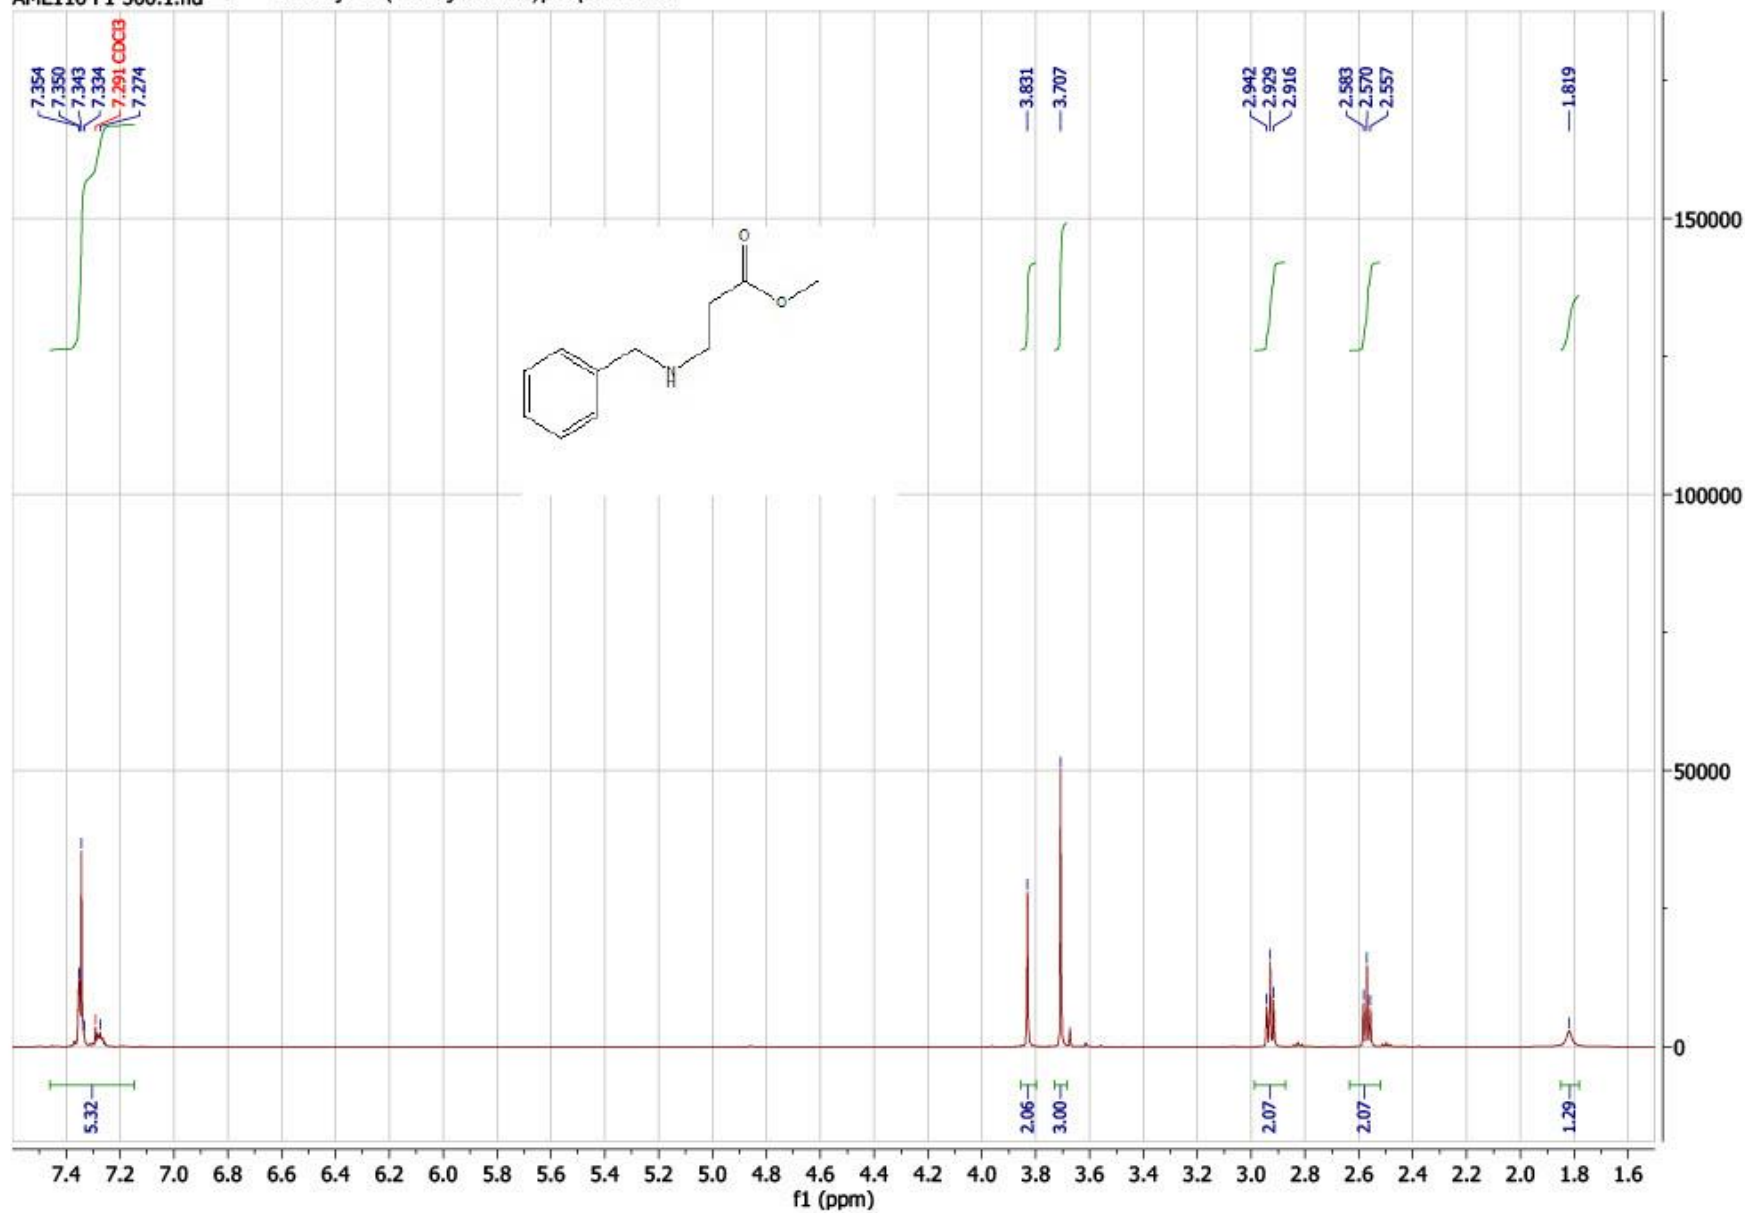



3-morpholinopropanenitrile

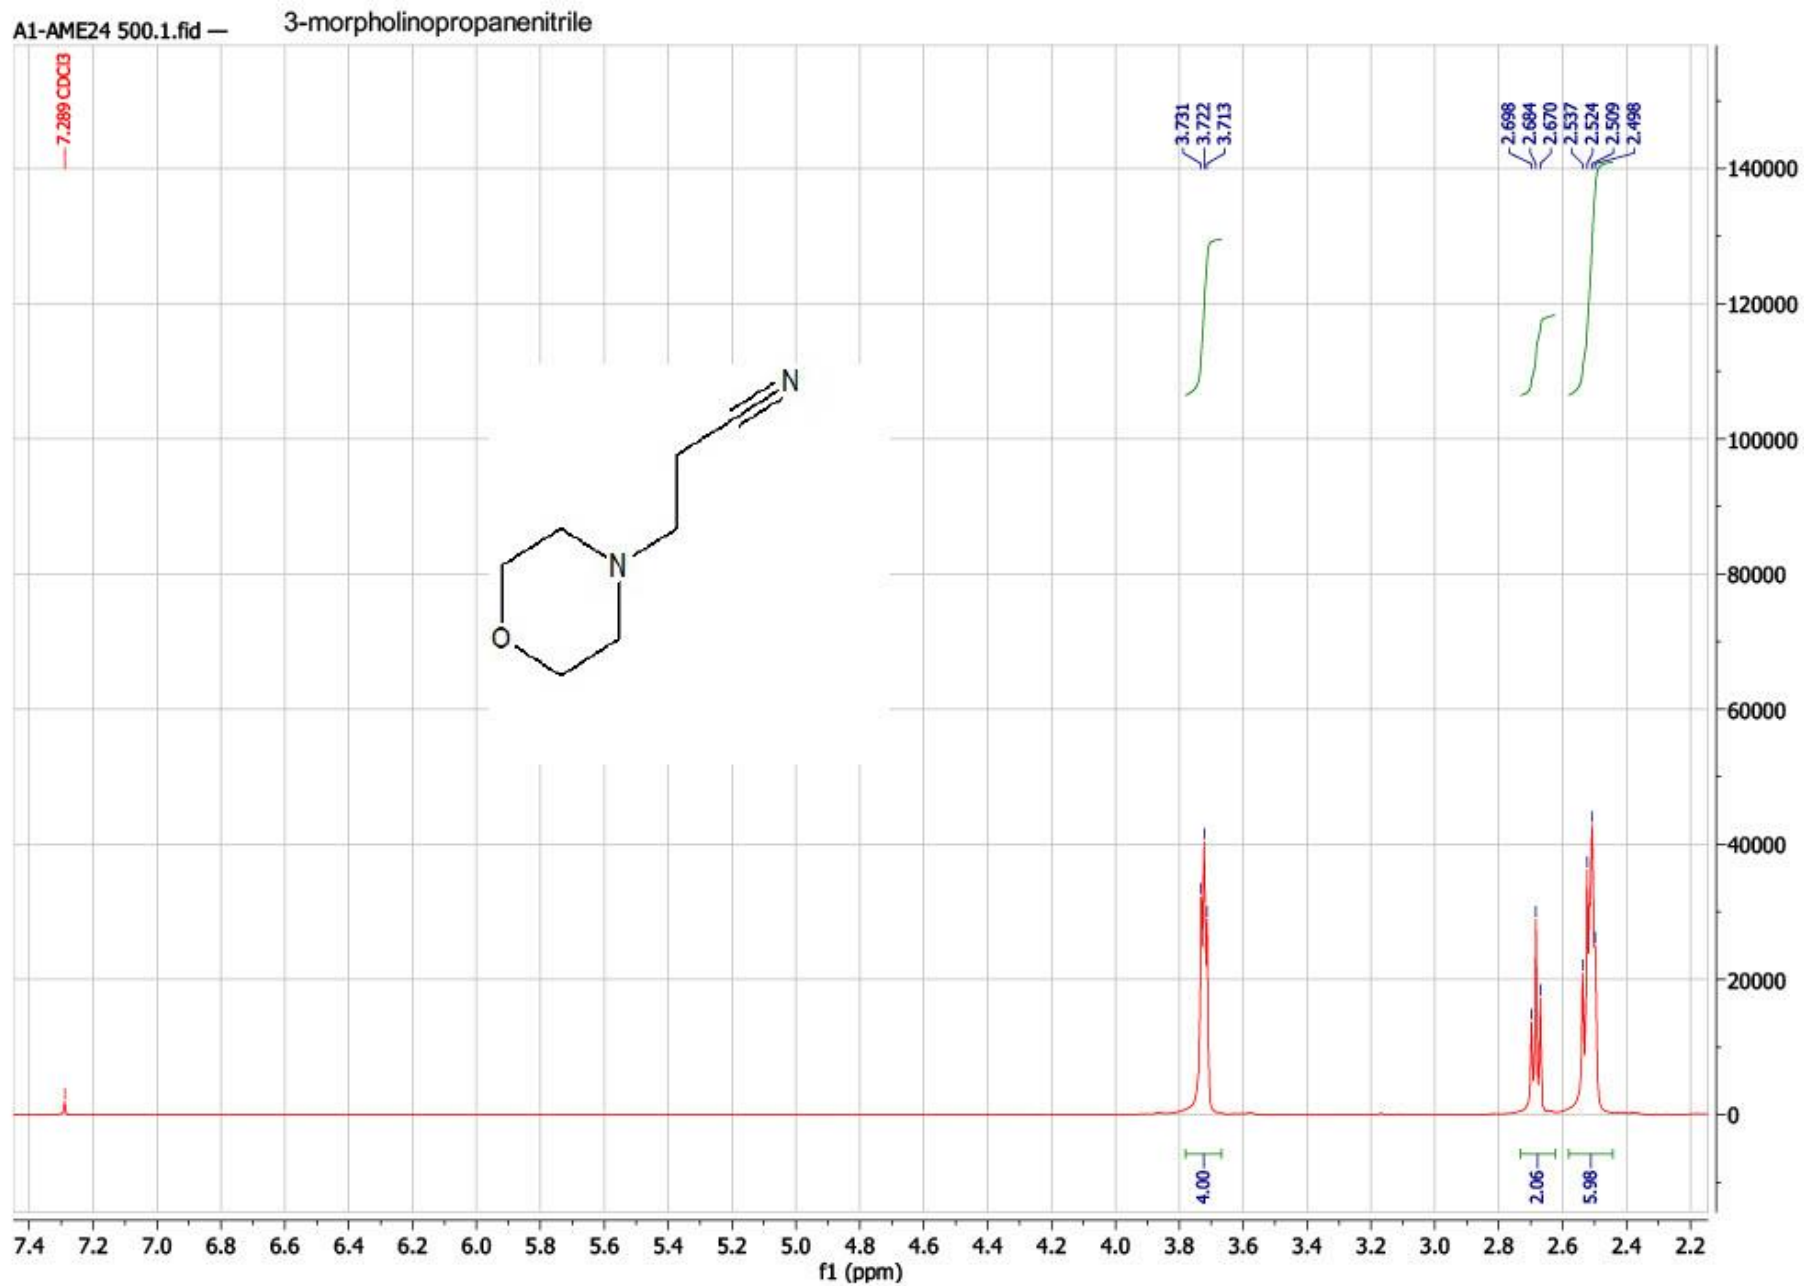

methyl 3-morpholinopropanoate

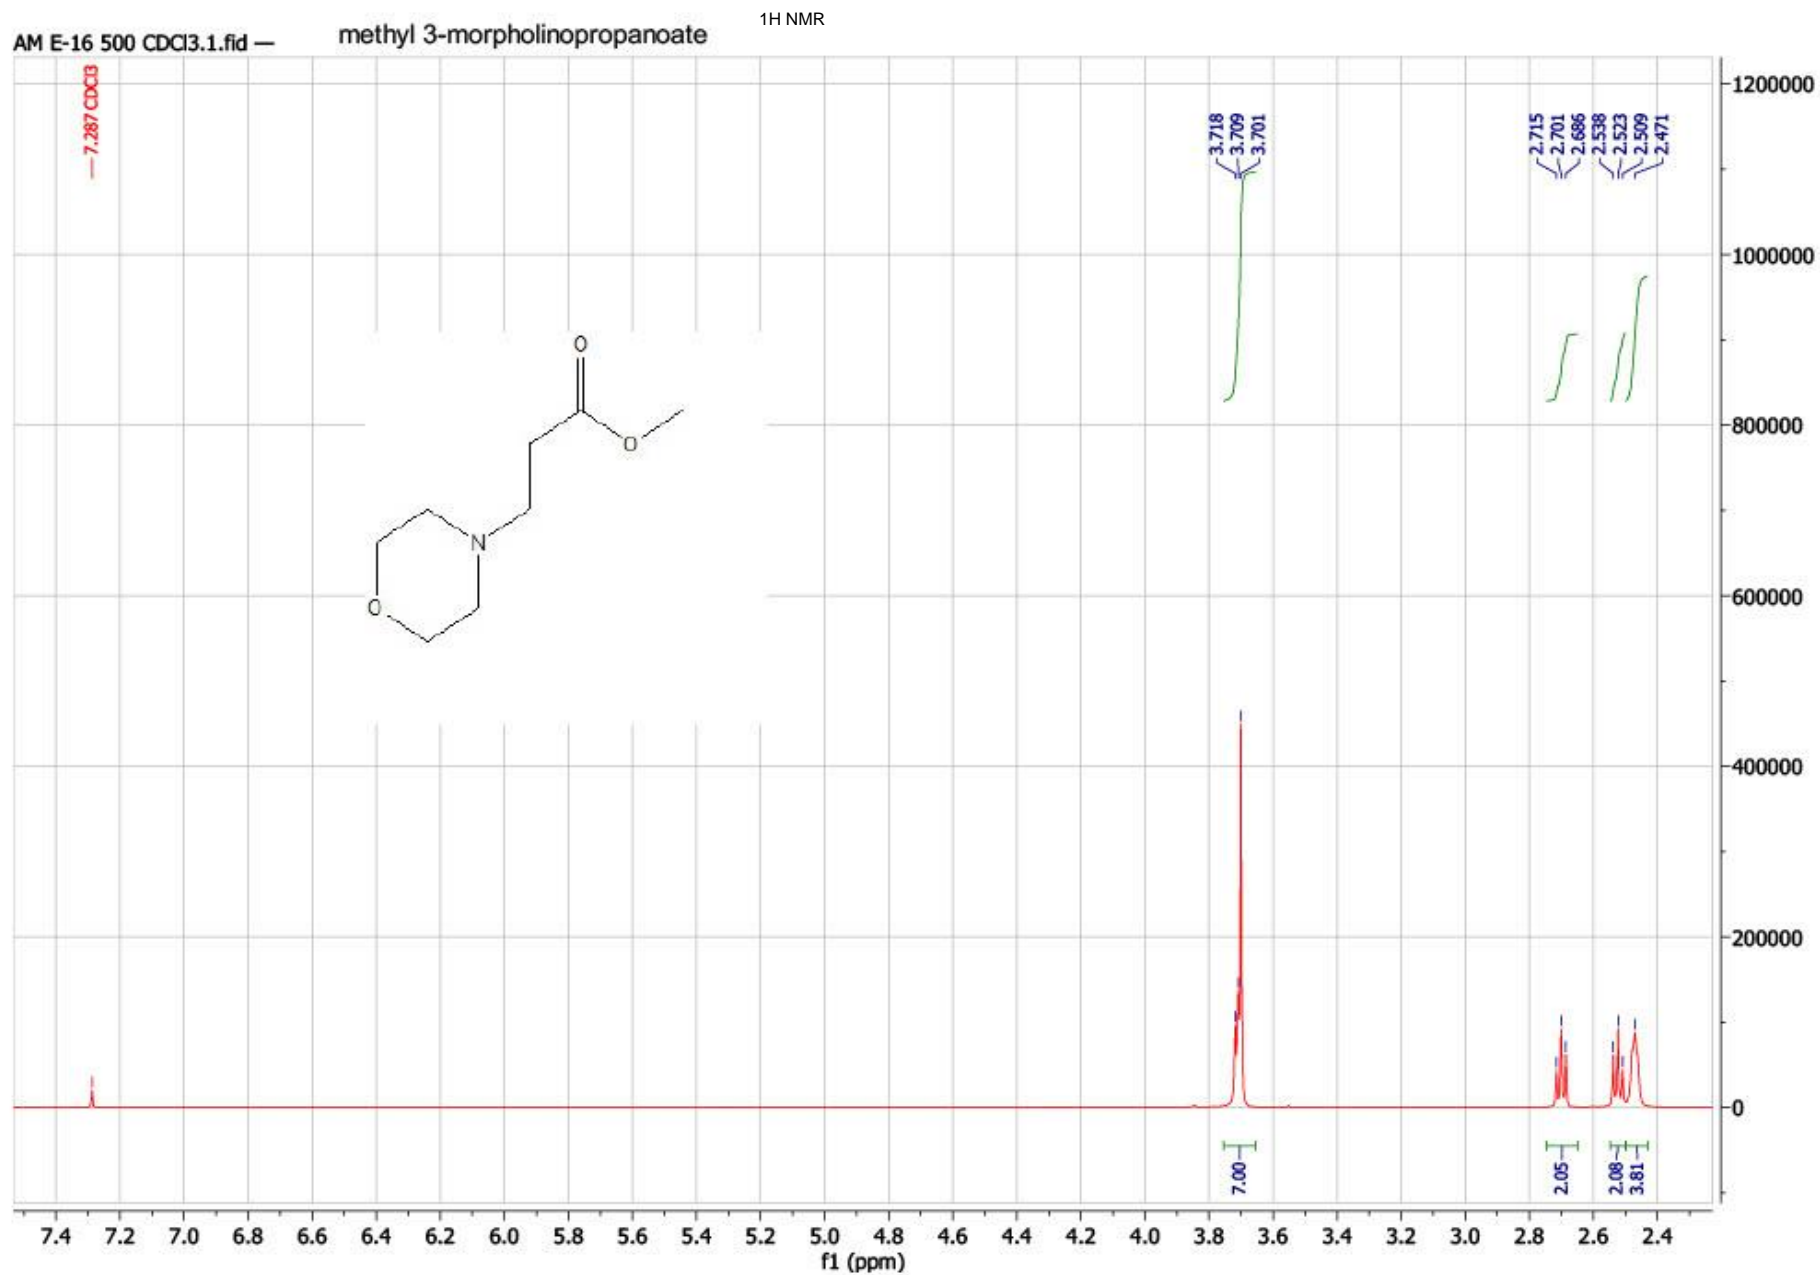

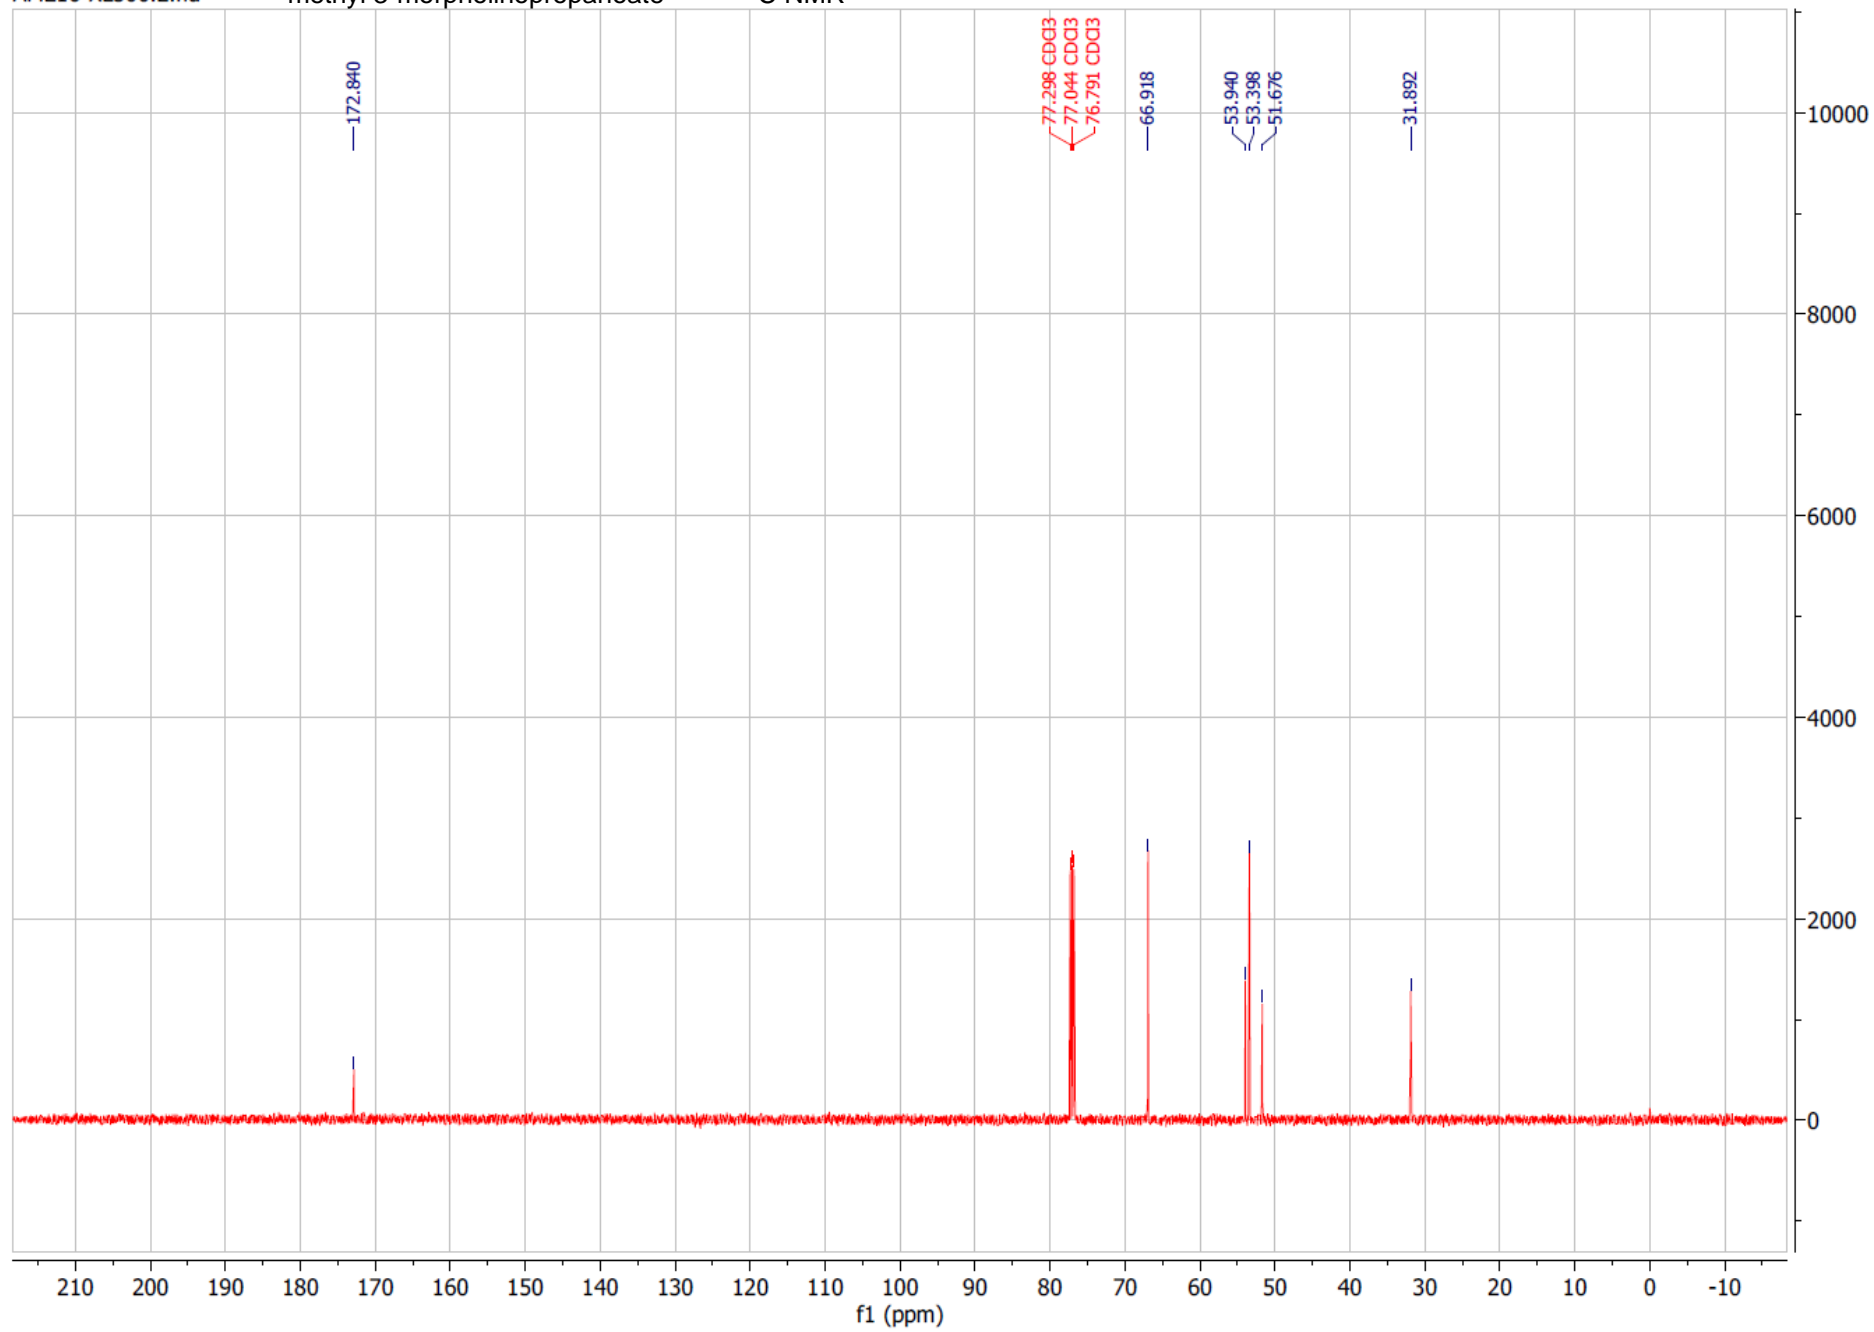

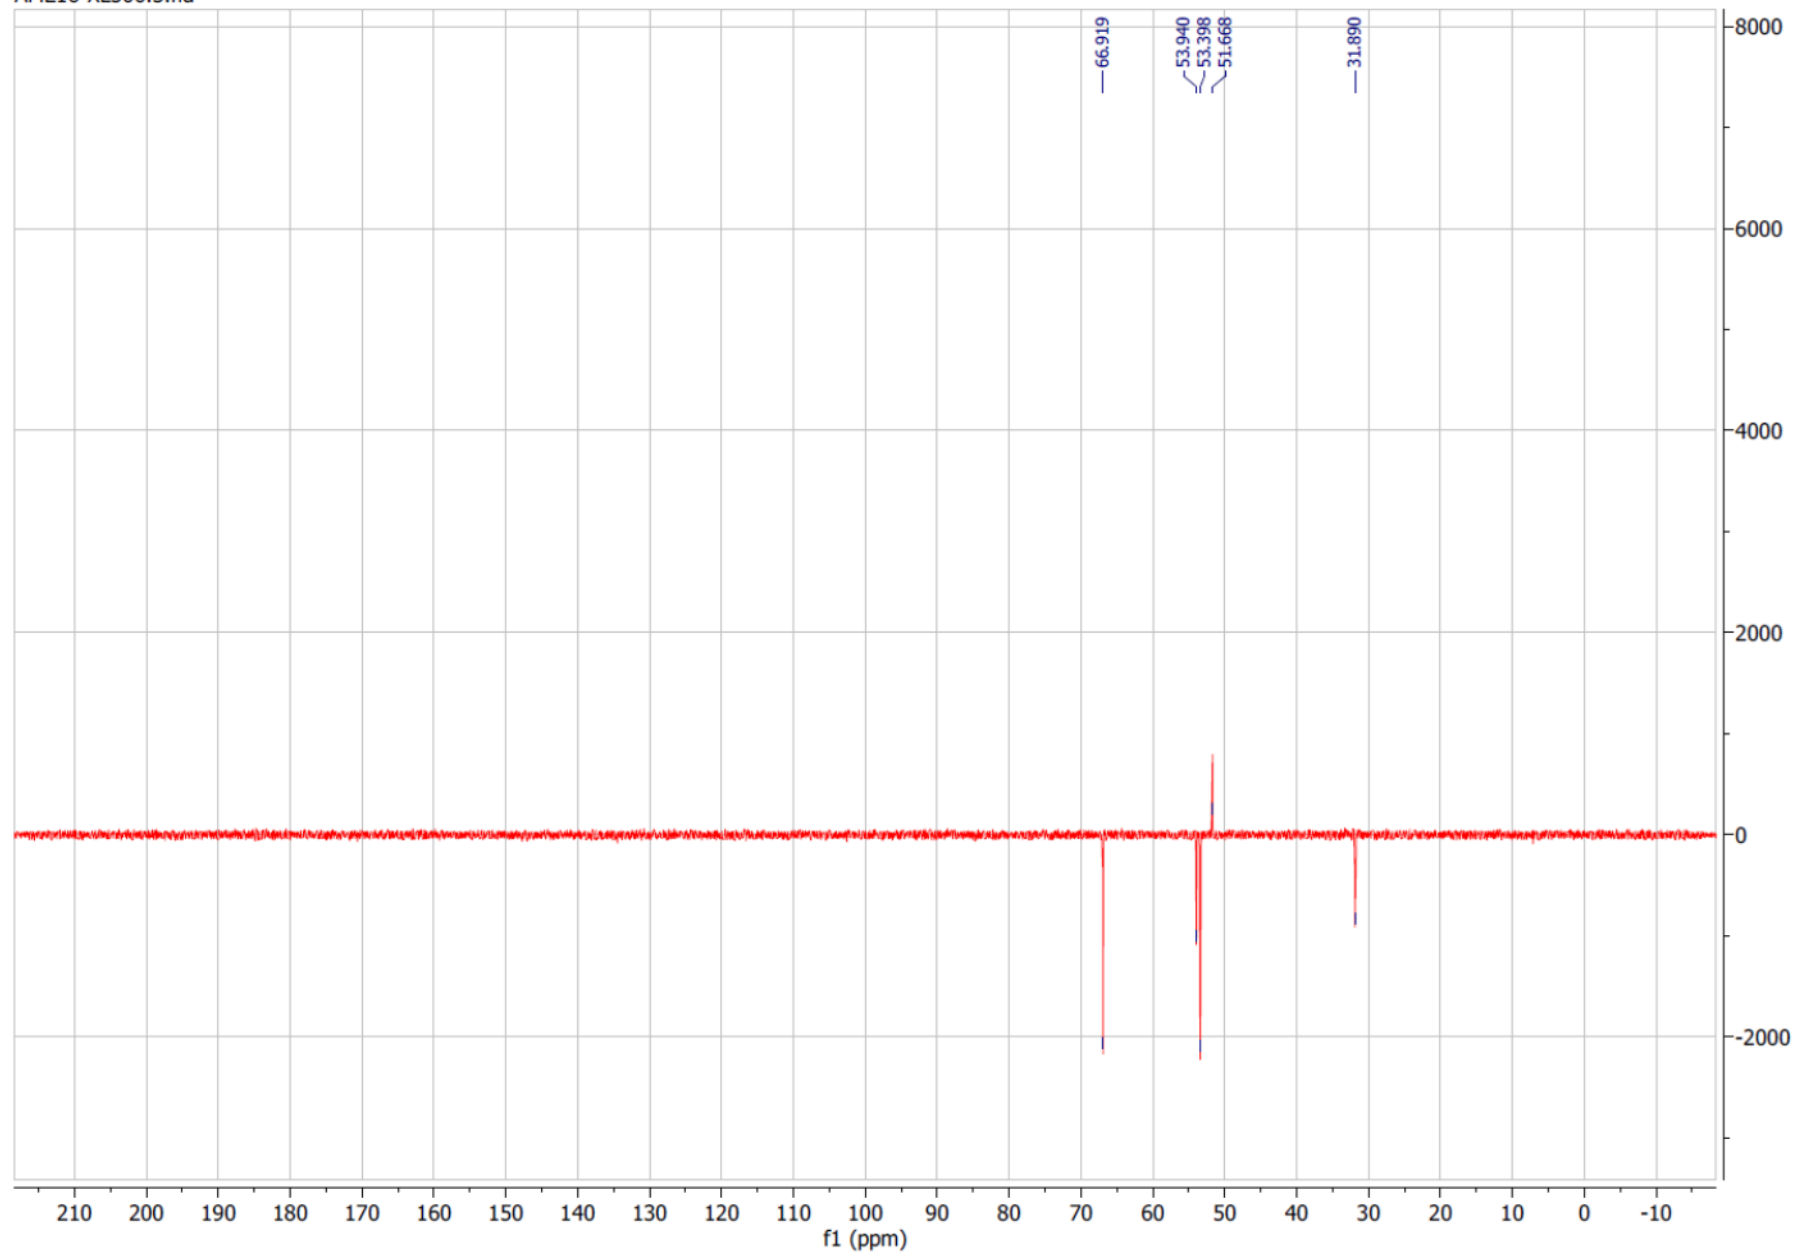

3-(dibutylamino)propanenitrile

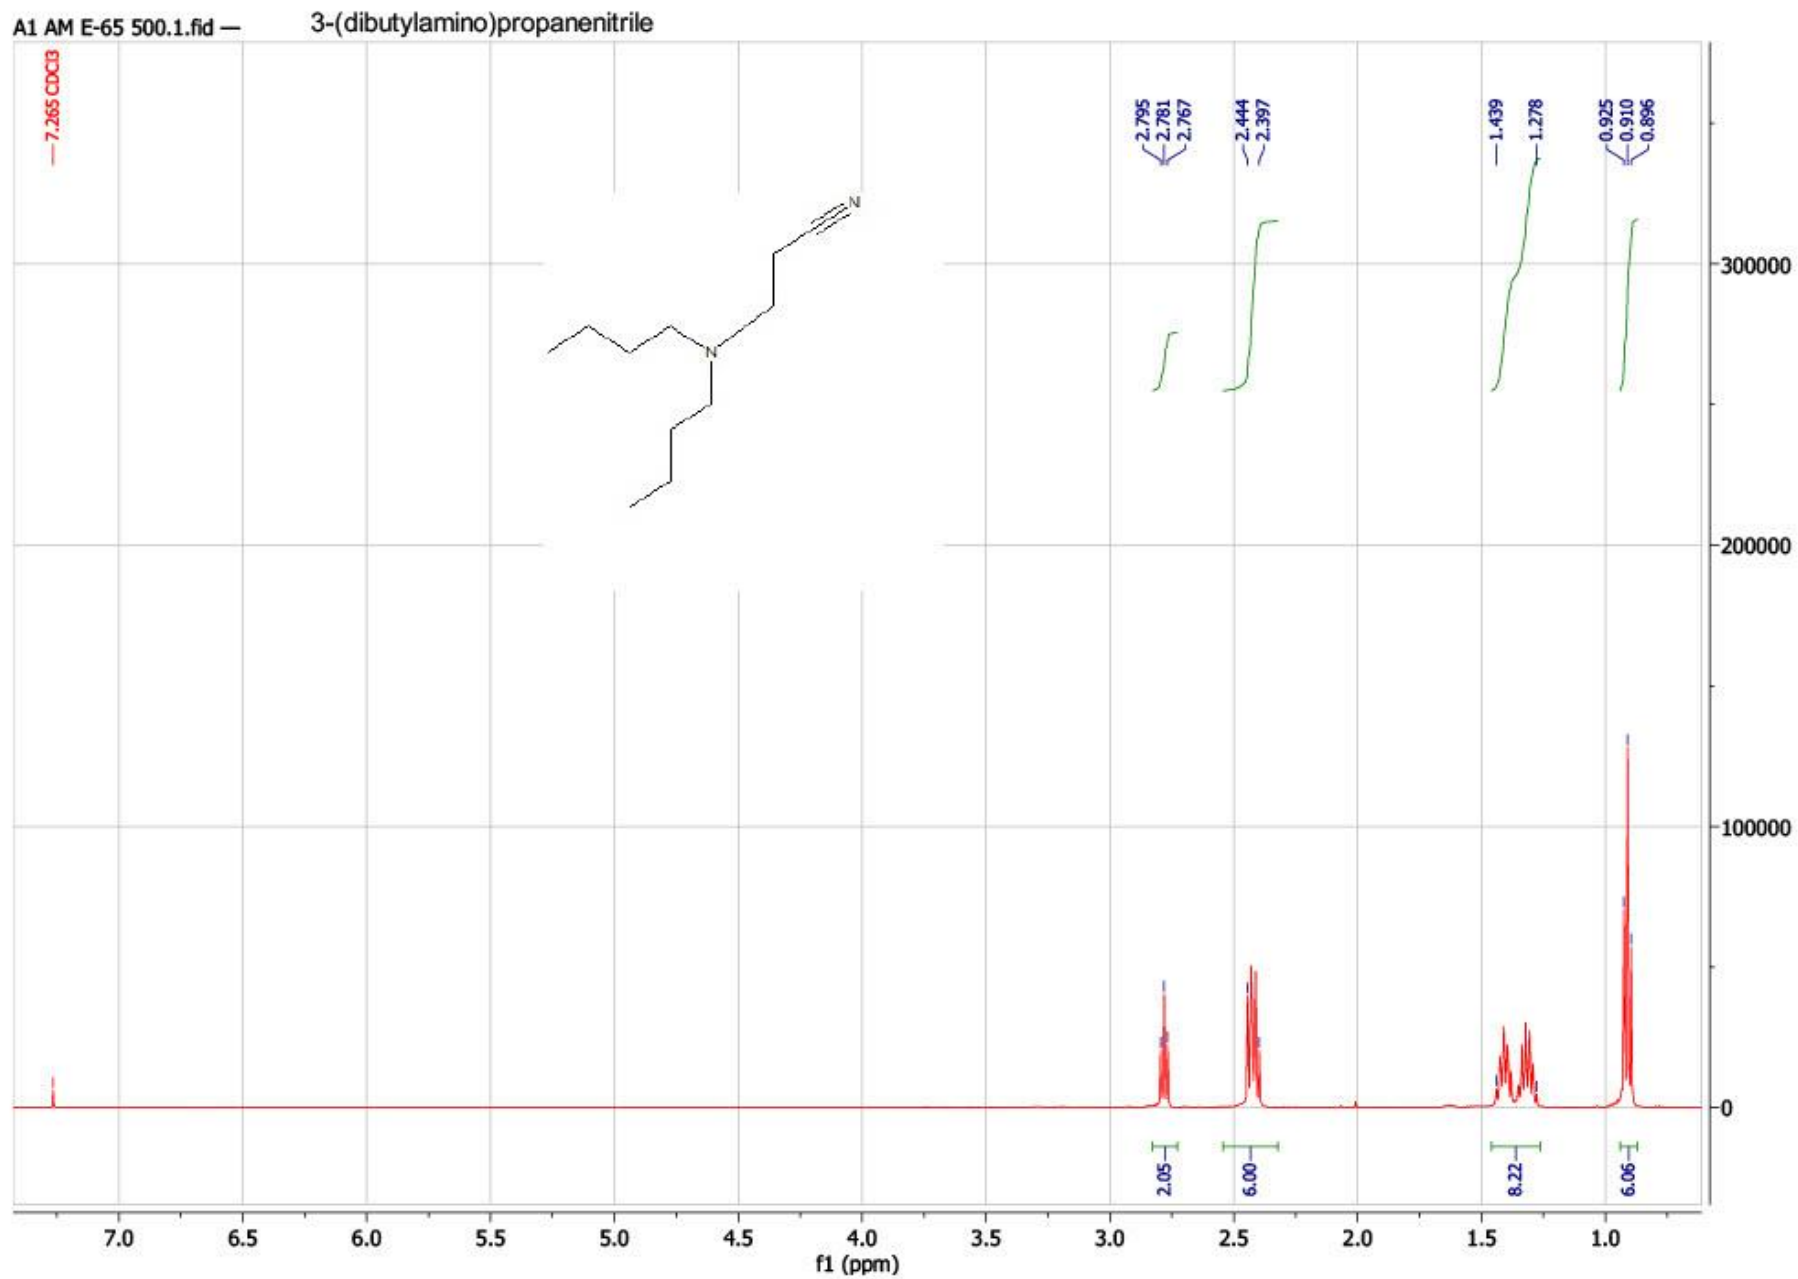

methyl 3-(dibutylamino)propanoate

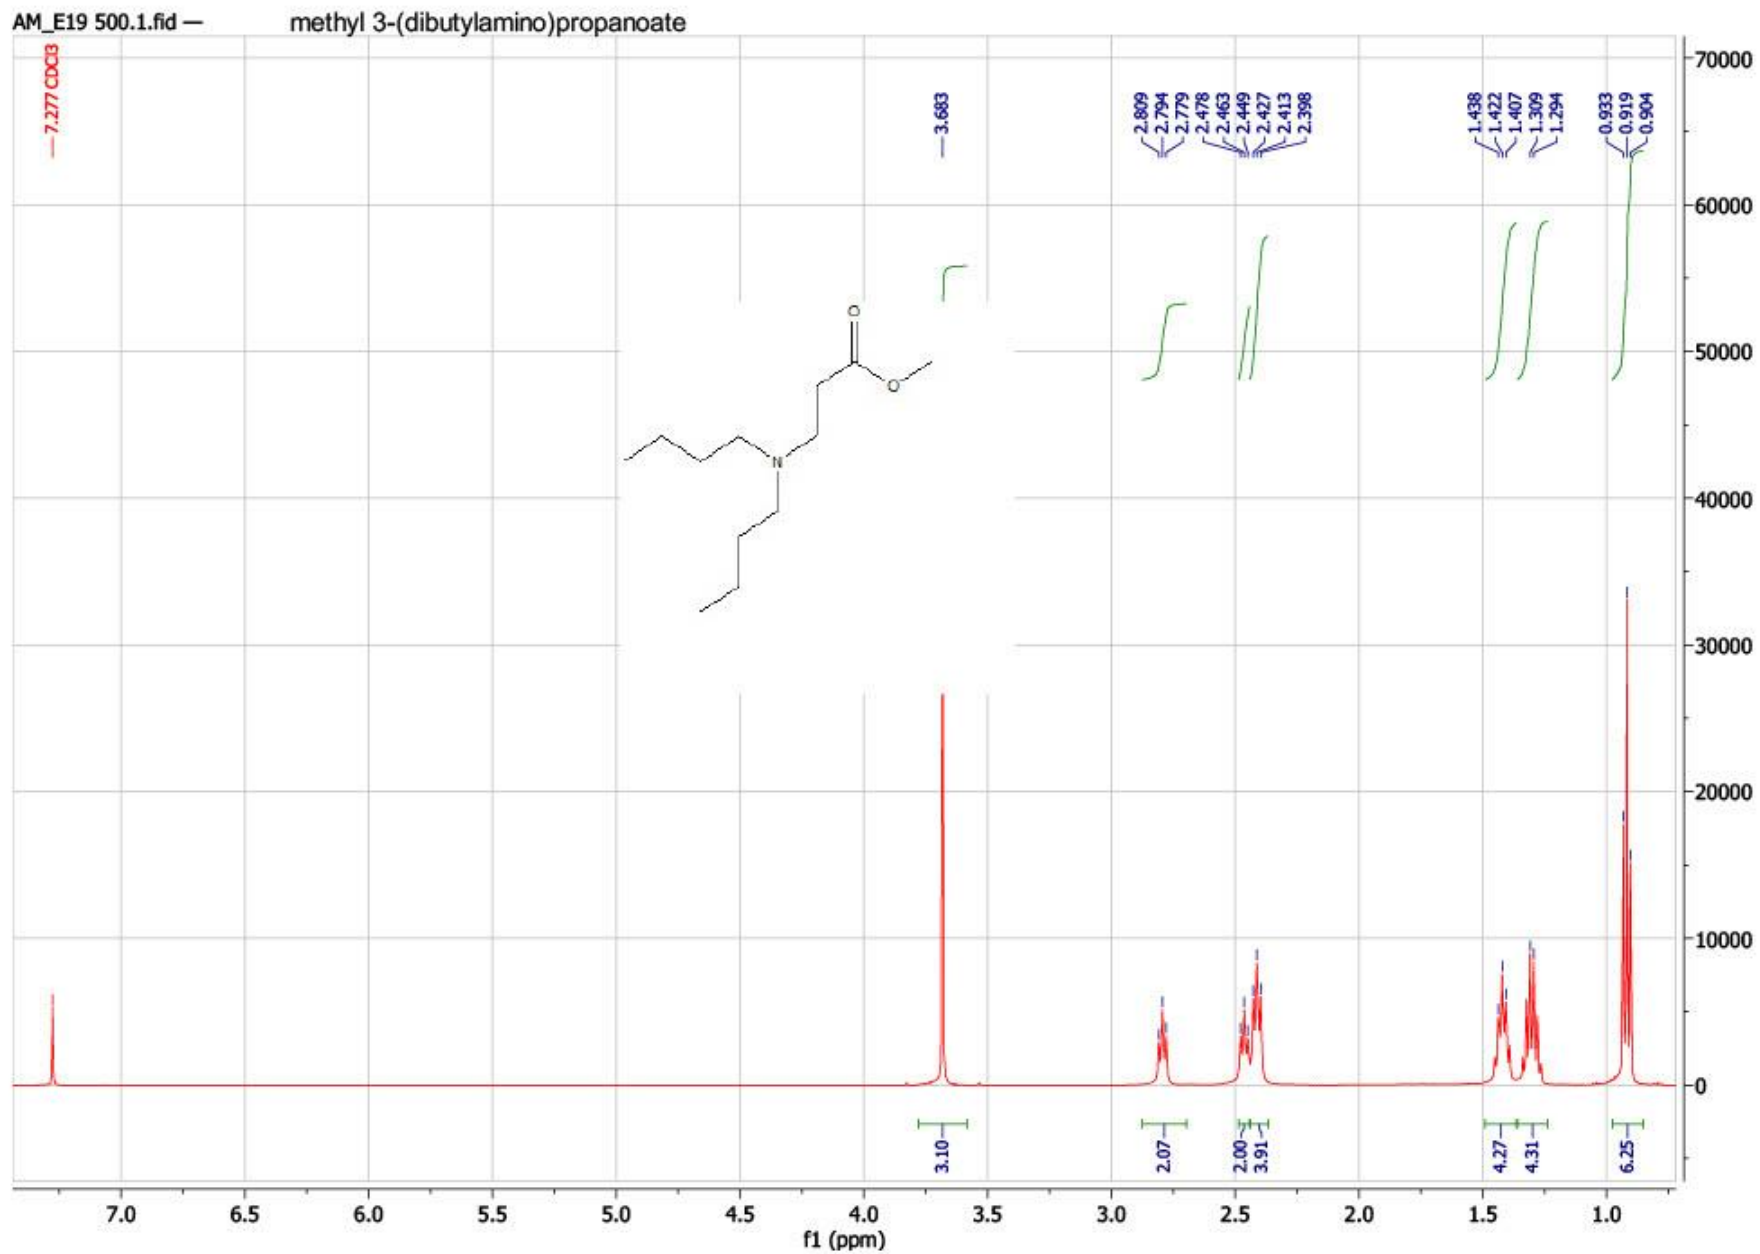

3-(phenylamino)propanenitrile

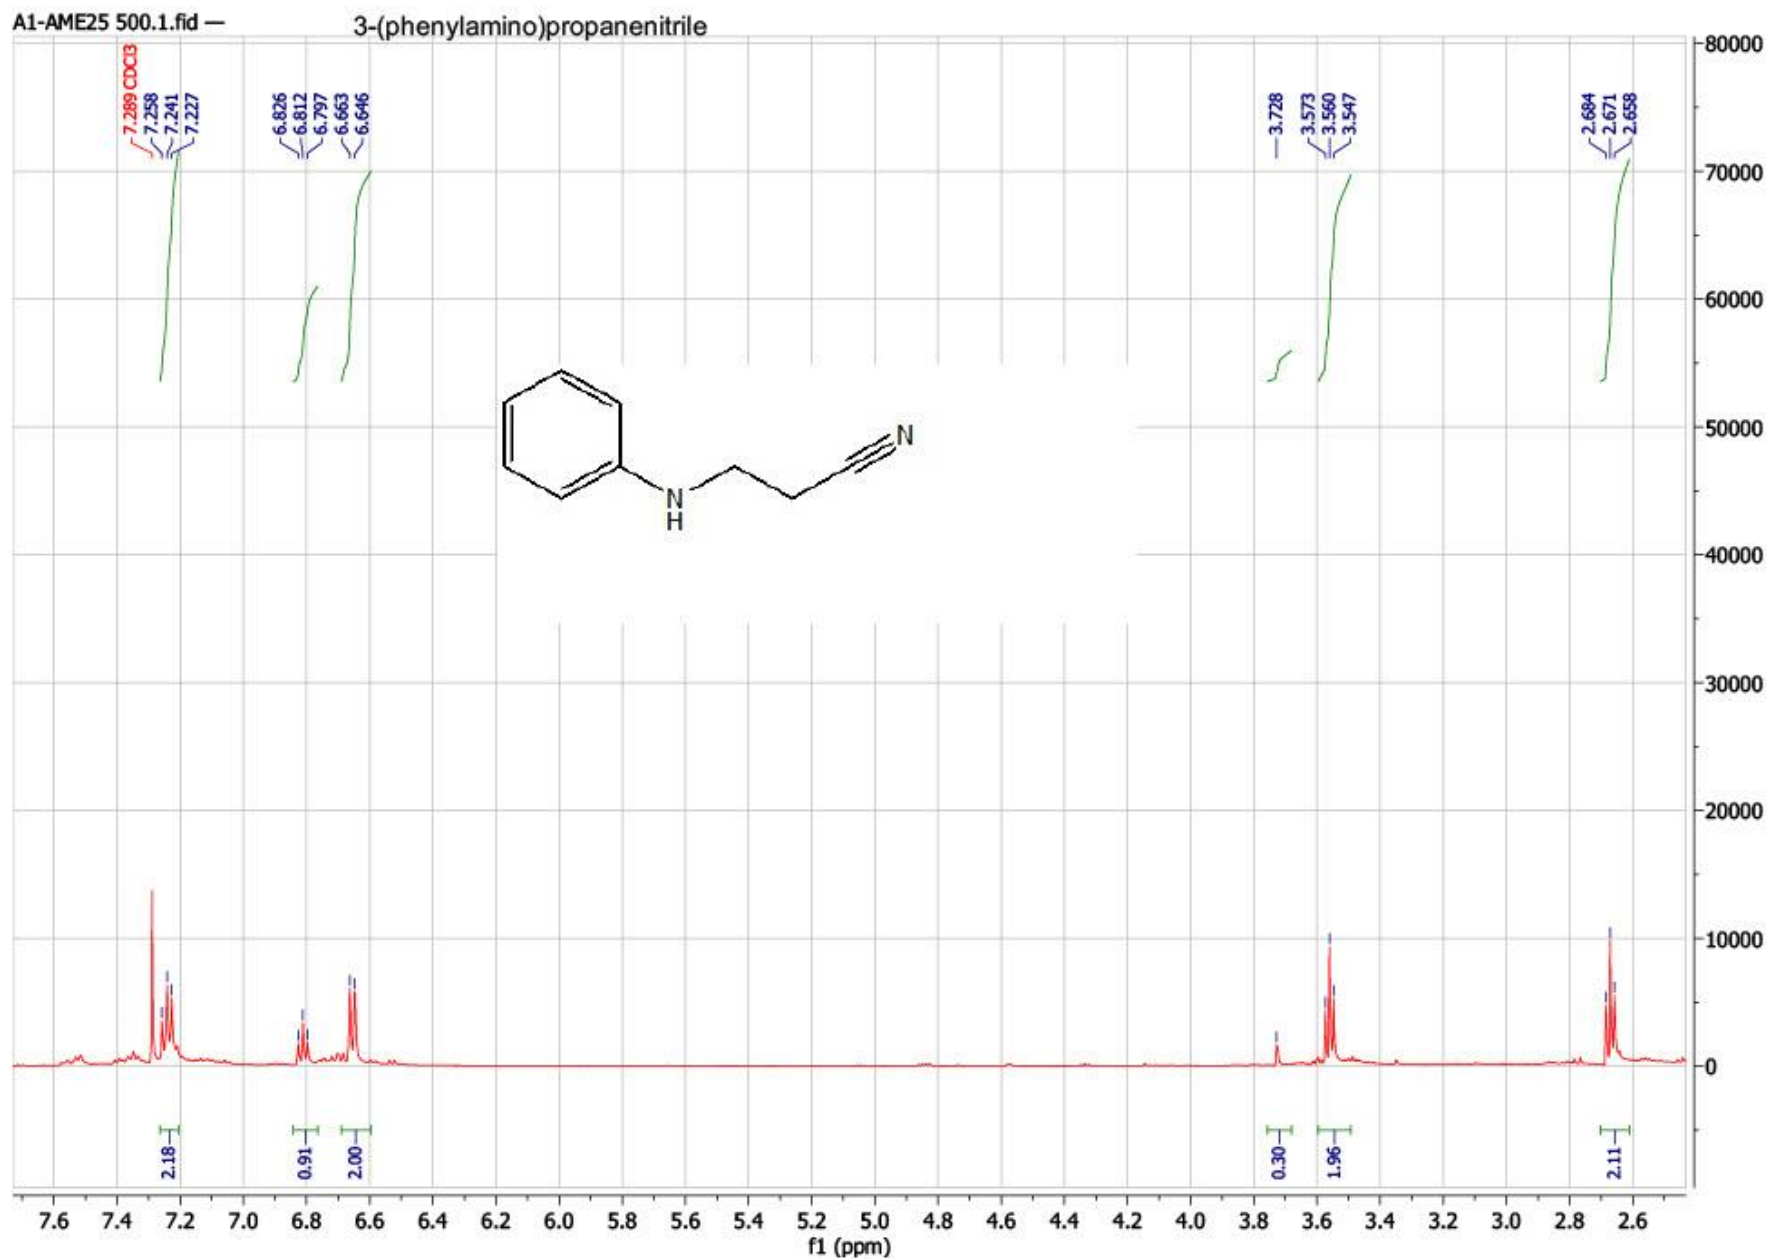

methyl 3-(phenylamino)propanoate

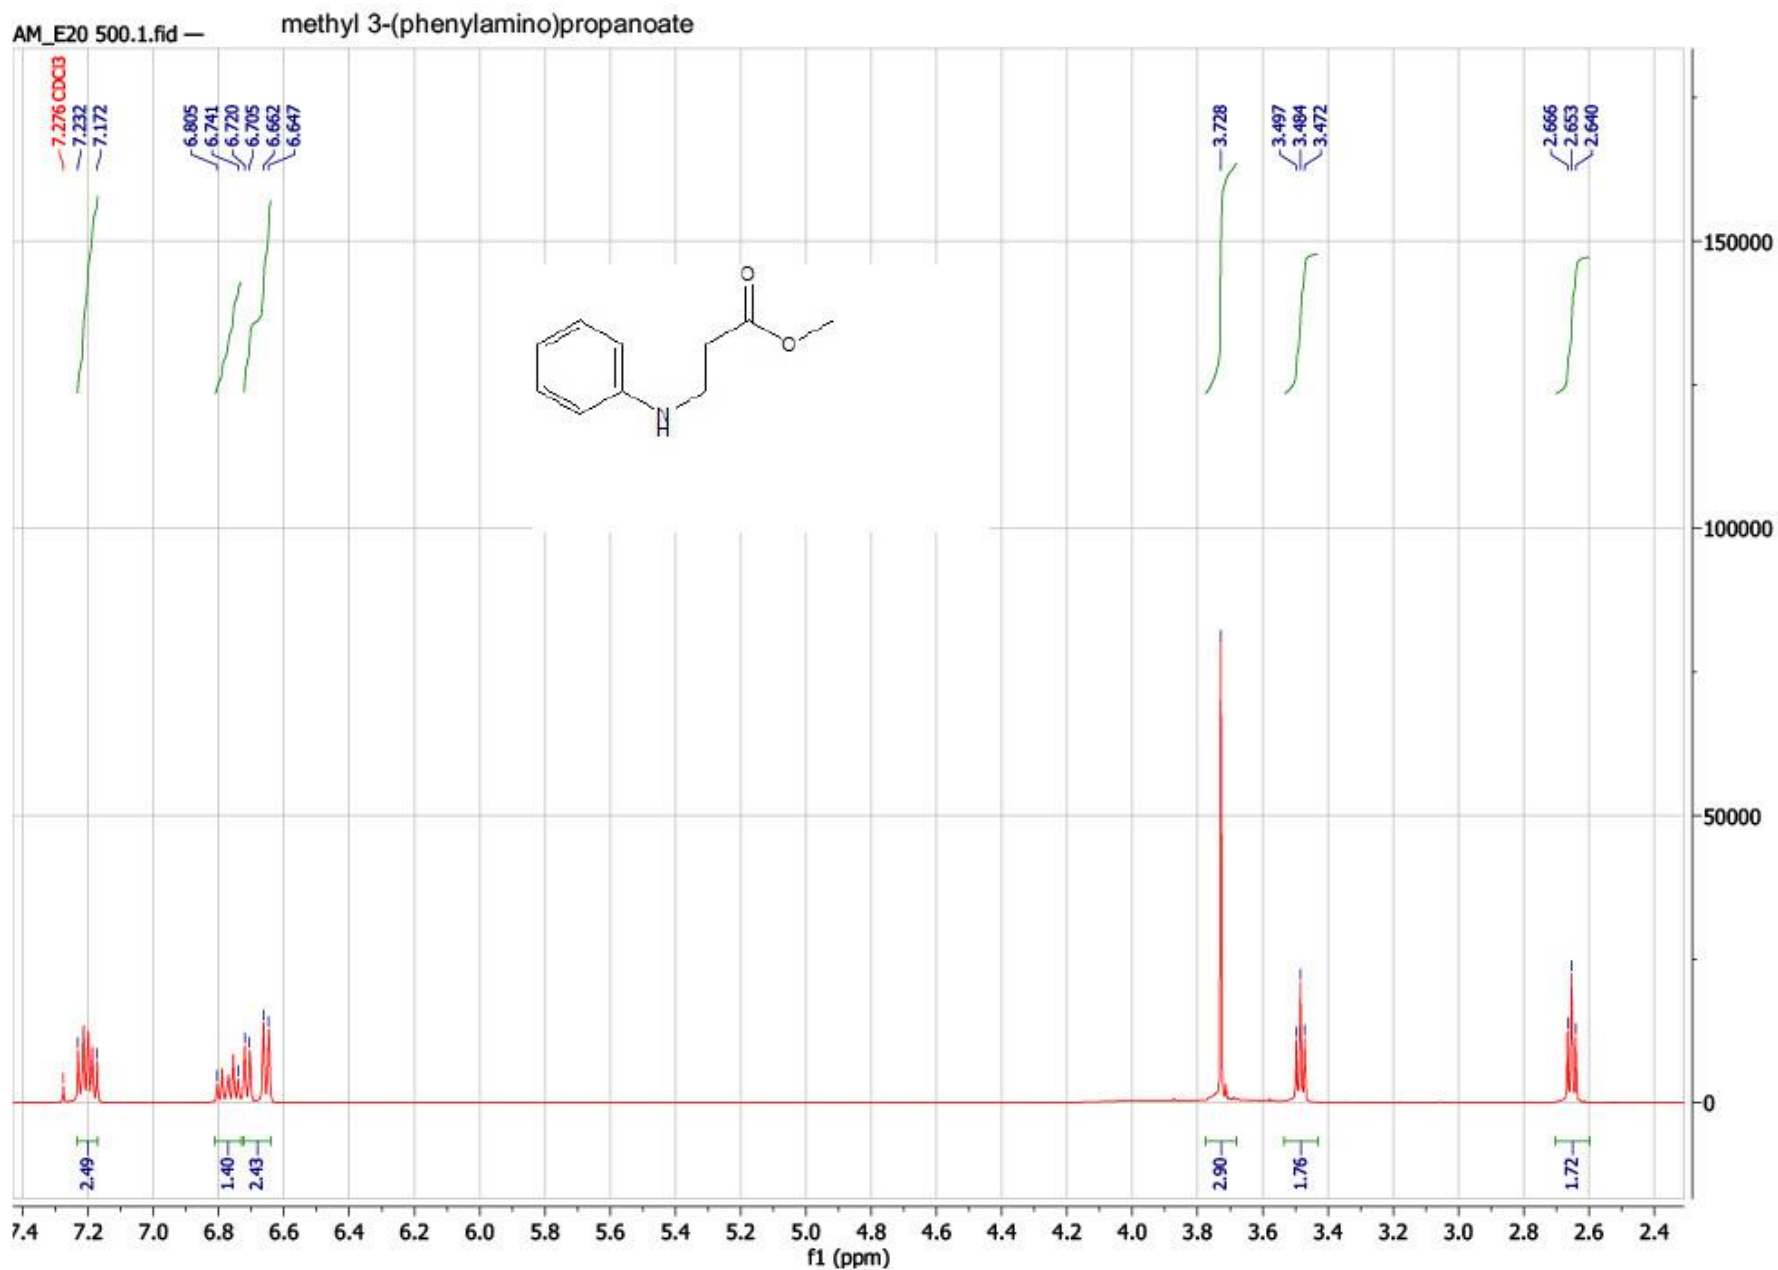



3-(piperidin-1-yl)propanenitrile

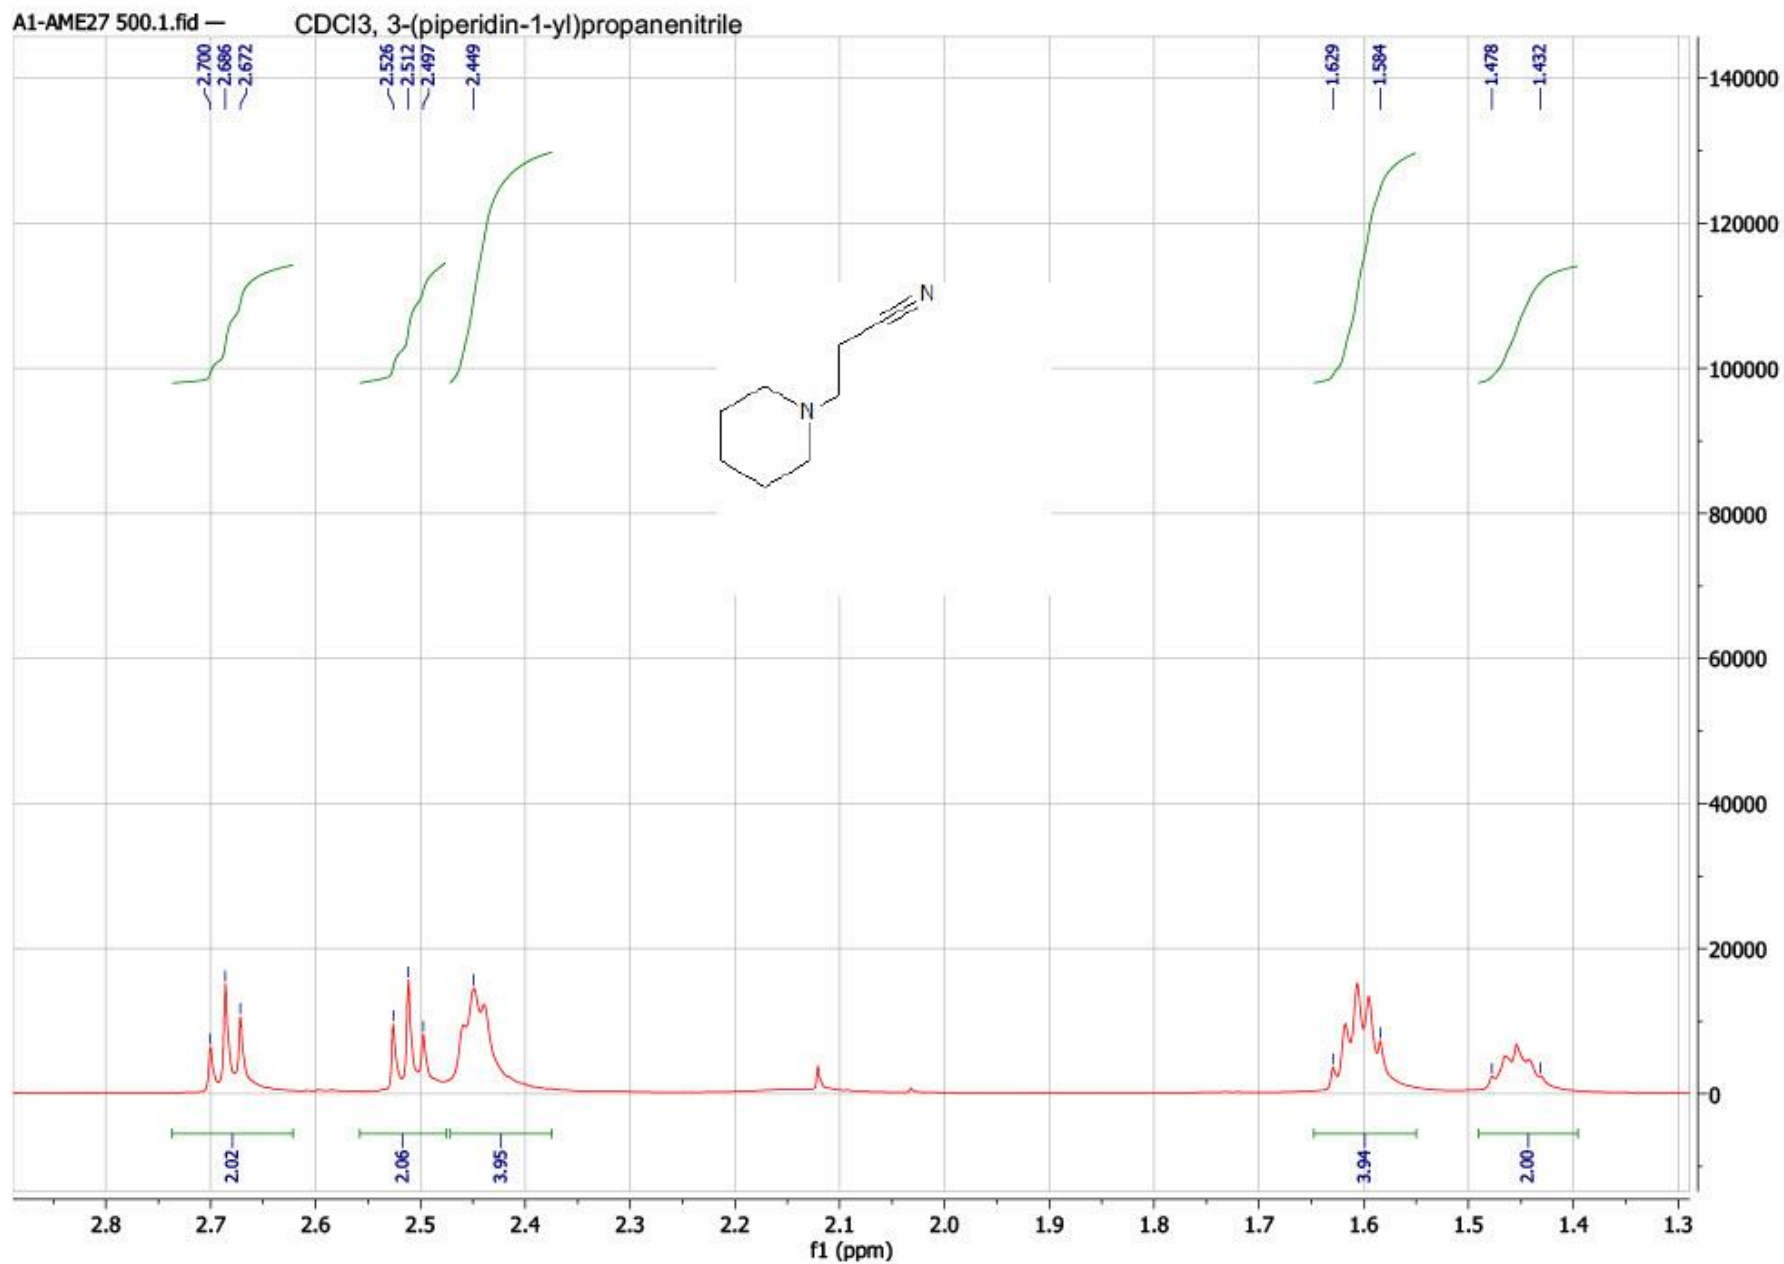

methyl 3-(piperidin-1-yl)propanoate

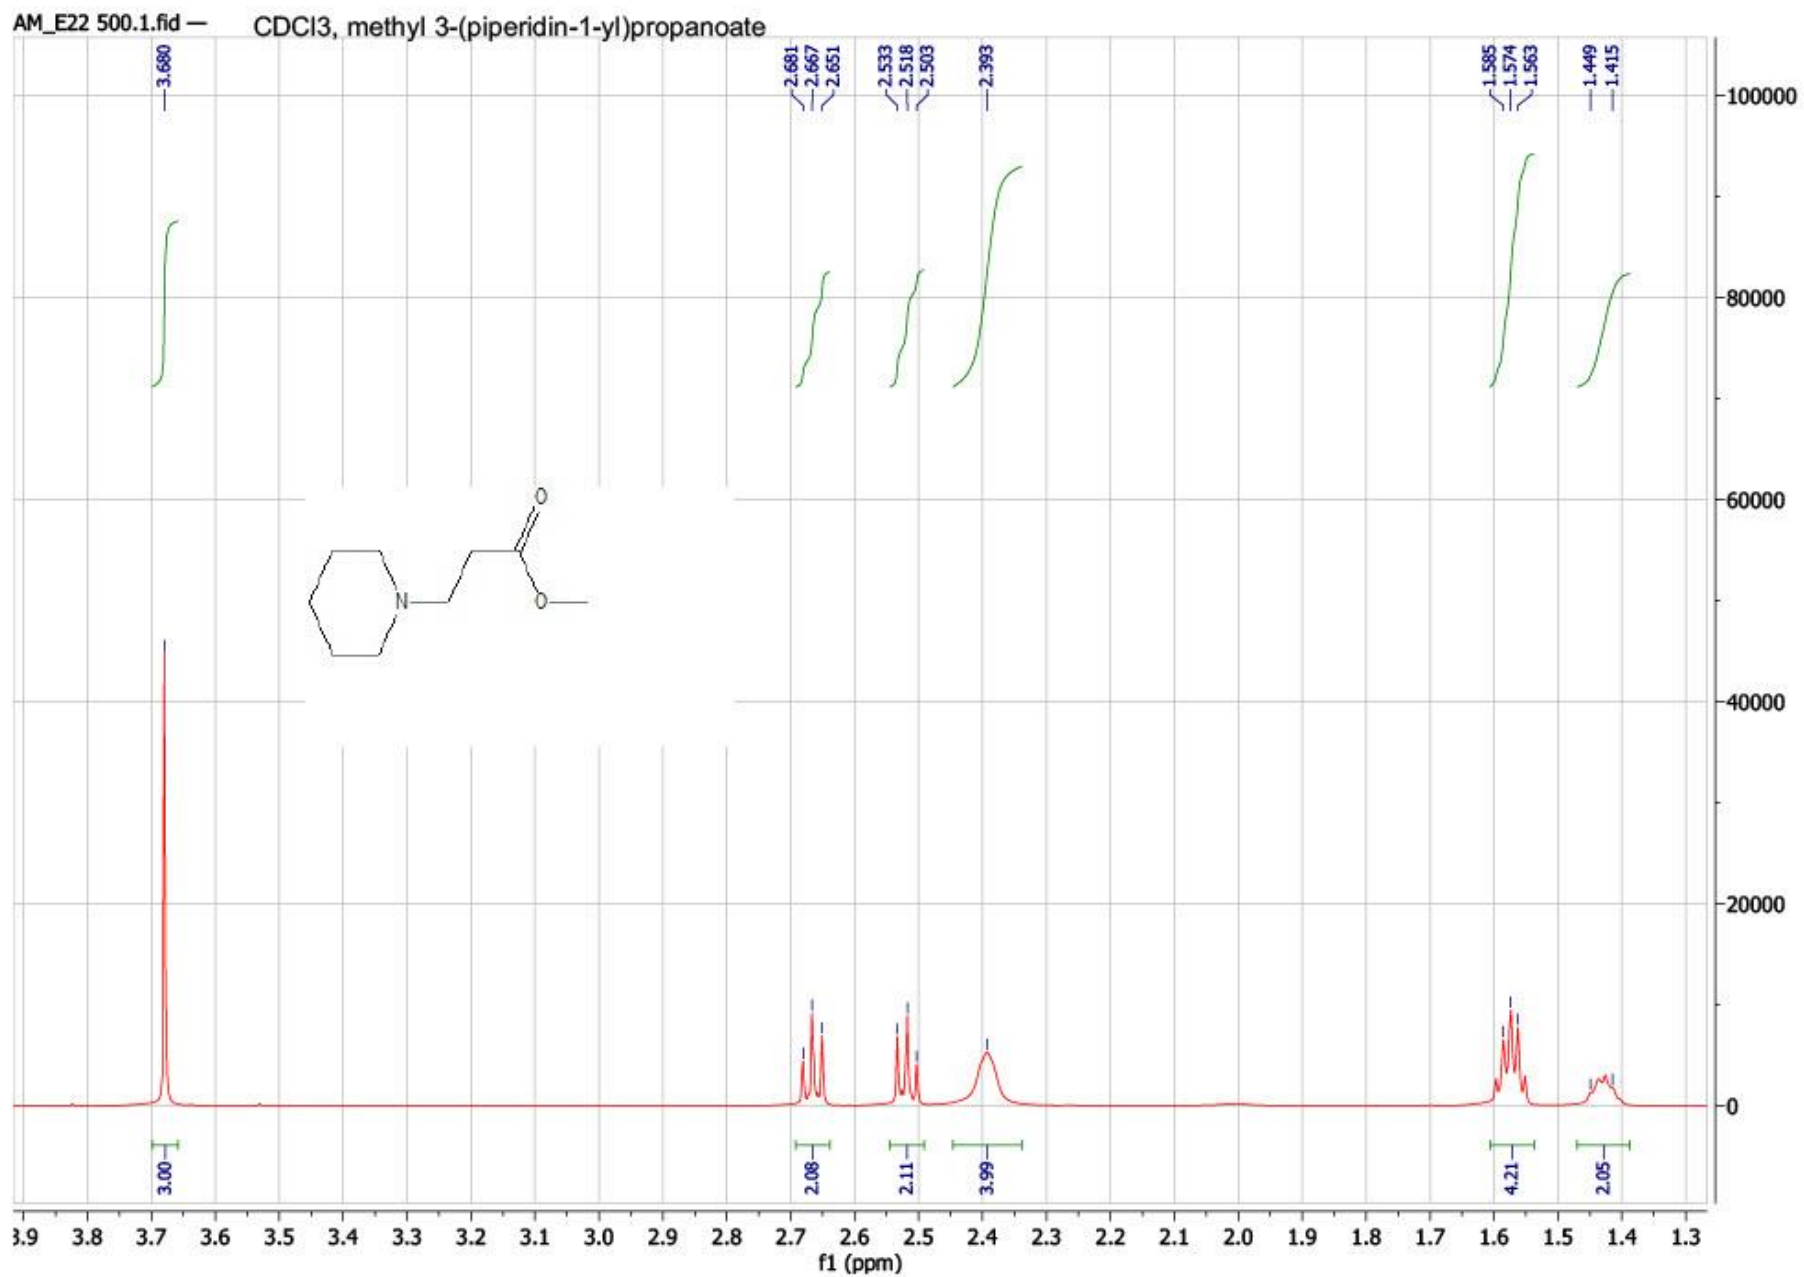

Supplement: d3ob02006a1.pdf [file d3ob02006a1.pdf]
